1 **Sas3-mediated histone acetylation regulates effector gene activation in a fungal plant**  
2 **pathogen**

3 **Running title: Histone acetylation and fungal effector gene regulation**

4 Suarez-Fernandez, Marta<sup>a,b</sup>; Álvarez-Aragón, Rocío<sup>a</sup>; Pastor-Mediavilla, Ana<sup>a</sup>; Maestre-Guillén,  
5 Alejandro<sup>a</sup>; del Olmo, Ivan<sup>a\*</sup>; De Francesco, Agustina<sup>a</sup>; Meile, Lukas<sup>a</sup>; Sánchez-Vallet, Andrea<sup>a#</sup>

6 <sup>a</sup> Centro de Biotecnología y Genómica de Plantas (CBGP, UPM-INIA), Universidad Politécnica de  
7 Madrid (UPM)—Instituto Nacional de Investigación y Tecnología Agraria y Alimentaria (INIA),  
8 Madrid, Spain

9 <sup>b</sup> Department of Marine Sciences and Applied Biology, Laboratory of Plant Pathology, University  
10 of Alicante, Alicante, Spain

11 # Address correspondence to Andrea Sánchez-Vallet, [andrea.sanchezv@upm.es](mailto:andrea.sanchezv@upm.es)

12 \* Current address: Centro de Biología Molecular Severo Ochoa, CSIC-UAM, Madrid, Spain

13 **Keywords:** Histone acetylation, *Zymoseptoria tritici*, Sas3, effector gene activation, Gcn5,  
14 chromatin remodeling, wheat

15 **Word count of article:**

16 Abstract: 195 words, Importance: 130 words, main text (excluding figure legends, references  
17 and materials and methods): 3977 words, Materials and Methods: 1631 words.

18 **ABSTRACT**

19 Effector proteins are secreted by plant pathogens to enable host colonization. Typically, effector  
20 genes are tightly regulated, have very low expression levels in axenic conditions, and are strongly  
21 induced during host colonization. Chromatin remodeling contributes to the activation of effector  
22 genes *in planta* by still poorly known mechanisms. In this work we investigated the role of  
23 histone acetylation in effector gene derepression in plant pathogens. We used *Zymoseptoria*  
24 *tritici*, a major pathogen of wheat, as a model to determine the role of lysine acetyltransferases  
25 (KATs) in plant infection. We showed that effector gene activation is associated with chromatin  
26 remodeling, featuring increased acetylation levels of histone H3 lysine 9 (H3K9) and 14 (H3K14)  
27 in effector loci. We functionally characterized the role of *Z. tritici* KATs and demonstrated their  
28 distinct contributions to growth, development, and infection. Sas3 is required for host  
29 colonization and pycnidia production, while Gcn5 has a major role in pycnidia production.  
30 Furthermore, we demonstrated that Sas3 is involved in acetylation of H3K9 and H3K14 in  
31 effector loci and in effector gene activation during plant infection. We propose that Sas3-  
32 mediated histone acetylation is required for spatiotemporal activation of effector genes and  
33 virulence of *Z. tritici*.

34 **IMPORTANCE**

35 Pathogen infections require the production of effectors that enable host colonization. Effectors  
36 have diverse functions and are only expressed at certain stages of the infection cycle. Thus,  
37 effector genes are tightly regulated by several mechanisms, including chromatin remodeling.  
38 Here, we investigate the role of histone acetylation in effector gene activation in the fungal  
39 wheat pathogen *Zymoseptoria tritici*. We demonstrated that lysine acetyltransferases (KATs) are  
40 essential for the spatiotemporal regulation of effector genes. We show that two KATs, Sas3 and  
41 Gcn5, are involved in leaf symptom development and pycnidia formation. Importantly, our  
42 results indicated that Sas3 controls histone acetylation of effector loci and is a regulator of  
43 effector gene activation during stomatal penetration. Overall, our work demonstrates the key  
44 role of histone acetylation in regulating gene expression associated with plant infection.

## 45 1. INTRODUCTION

46 Plant pathogens produce and secrete effectors into host tissues to facilitate colonization.  
47 Effectors have several functions including suppression of the immune response, alteration of  
48 plant development, acquisition of nutrients, and interference with the host microbiota (1).  
49 Effectors are frequently required at specific phases of the infection cycle (2). Consequently, the  
50 transcriptional control of effector genes is key to provide the pathogen with a dynamic infection  
51 machinery. Despite the importance of tight effector gene regulation in fungal plant pathogens,  
52 the mechanisms involved remain mostly enigmatic.

53 Chromatin remodeling is a pivotal mechanism of gene regulation and involves post-translational  
54 modifications of histone tails, such as acetylation and methylation. These modifications provide  
55 a conserved mechanism that modulates the accessibility of the transcription machinery to the  
56 DNA and thereby alters gene expression (3–5). Writing enzymes, including methylases,  
57 acetylases and erasing enzymes, such as demethylases and deacetylases, are dynamically  
58 involved in the posttranscriptional modification of histone tails in eukaryotes (6, 7). Effector  
59 genes are frequently located in heterochromatic regions of the genome (8, 9). In plant-  
60 associated fungi, including *Leptosphaeria maculans*, *Epichloë festucae*, *Magnaporthe oryzae* and  
61 *Zymoseptoria tritici*, effector genes are enriched in trimethylation of histone H3 lysine 9 (H3K9)  
62 and/or 27 (H3K27) in the absence of the host (10–13). During plant colonization, effector gene  
63 activation is associated with a tightly regulated reduction in the methylation levels in H3K9  
64 and/or H3K27, as shown in *E. festucae* and *Z. tritici*. Accordingly, disruption of the key enzymes  
65 involved in methylation of H3K27 or H3K9 has been shown to enhance expression of effector  
66 genes and secondary metabolite gene clusters (10, 13). Thus, derepression of effector genes  
67 during host colonization involves changes in the chromatin state.

68 Although acetylation of specific residues of core histone tails has been shown to regulate  
69 transcription in eukaryotes (6, 7), the role of lysine acetyltransferases (KATs) in the overall fitness  
70 of fungal pathogens and in the spatiotemporal expression activation of effector genes remains  
71 to be largely understood. KATs transfer acetyl groups from acetyl-coenzyme A onto lysine  
72 residues of core histones and commonly form part of complexes (7). Frequently, KAT complexes  
73 harbor regulatory components that regulate KAT activity and substrate specificity to prevent  
74 uncontrolled histone acetylation (14). KATs are classified into different families, including the  
75 GNAT (from Gcn5-related N-acetyltransferase) and the MYST (MOZ, YBF2/SAS3, SAS2, and  
76 TIP60) families (7). Histone acetylation in filamentous fungi has been reported to regulate  
77 several biological processes such as growth, reproduction, secondary metabolite synthesis and

78 pathogenicity. For instance, orthologues of Gcn5 mediate dimorphic changes, tolerance to  
79 stress, and virulence in *Ustilago maydis* (15), secondary metabolite regulation in *Aspergillus*  
80 *nidulans* (16), and stress tolerance and conidiation in *Alternaria alternata* (17). KATs from the  
81 MYST family are involved in growth and conidiation of *M. oryzae* and *A. alternata* (17, 18). In  
82 *Fusarium graminearum* KATs from the GNAT and MYST families mediate secondary metabolite  
83 regulation and virulence (19), highlighting the complexity of the role of KATs in trait regulation  
84 in fungi. Remarkably, histone acetylation is not only involved in fungus-plant interactions but  
85 also in fungus-bacterium interactions. Upon interaction of the filamentous fungus *A. nidulans*  
86 with the bacterium *Streptomyces rapamycinicus*, fungal secondary metabolite gene clusters are  
87 induced. This process involves acetylation of H3K9 and acetylation of histone H3 at lysine 14  
88 (H3K14), and Gcn5 protein activity (16). Likewise, we hypothesized that histone acetylation plays  
89 a major role in effector gene activation in fungus-plant interactions. Given the important role of  
90 KATs in transcriptional activation in Eukaryotes and given the fact that effector genes are  
91 derepressed during host colonization (15–18), we propose that an increase of histone  
92 acetylation levels regulates activation of pathogen effector genes during plant infection.

93 *Z. tritici* is a major pathogen of wheat, causing significant yield losses in temperate climates (20).  
94 The infection cycle of *Z. tritici* initiates at the leaf surface with the germination of asexual or  
95 sexual spores. Emerged hyphae grow on the leaf surface and penetrate through the stomata.  
96 Subsequently, *Z. tritici* colonizes the apoplast and, after several days of infection, forms asexual  
97 fruiting bodies known as pycnidia (21). Chlorotic and necrotic symptoms are only observed after  
98 several days of infection of the pathogen, prior to asexual reproduction (22). *Z. tritici* mainly  
99 grows as a filamentous fungus on wheat leaf surfaces but can also grow as blastospores *in vitro*  
100 on rich media and occasionally on the leaf surface (23). Various effector genes are strongly  
101 induced during plant infection at different stages of the *Z. tritici* life cycle, *AvrStb6* and *Avr3D1*  
102 being activated during stomatal penetration and apoplast colonization, while *Mycgr3G76589* is  
103 expressed at later stages of the infection life cycle (10, 24, 25). Promoter activity and local  
104 reduction of histone methylation levels are required for the specific expression pattern of  
105 effector genes (10). Our integrative study aimed to determine the role of histone acetylation  
106 and KATs in effector gene regulation in *Z. tritici*. We demonstrated that dynamic histone  
107 acetylation of H3K9 and H3K14 is associated with expression activation of effector genes and  
108 host colonization.

## 109 2. RESULTS

### 110 2.1 *Z. tritici* has 7 orthologues of KATs

111 We first aimed to identify KAT orthologues in *Z. tritici*. To achieve this, we performed a BLAST  
112 search on annotated *Z. tritici* genes using previously characterized *Saccharomyces cerevisiae*  
113 KATs as queries. In addition, we used the dbHiMo database (26), which comprises histone-  
114 modifying enzymes from several fungal species including *Z. tritici*. A reverse BLAST analysis with  
115 the identified putative *Z. tritici* KAT orthologues was subsequently performed on the *S.*  
116 *cerevisiae* genome. We found 3 KAT orthologues from the MYST family, 2 from the GNAT family,  
117 and 1 from the specific fungal family RTT109 (Table 1). Additionally, 1 orthologue of Gcn5-  
118 related N-acetyltransferase (Ngs1; Table 1) previously identified in *Candida albicans* was also  
119 identified in *Z. tritici* (27).

120 The BLASTp (Table S1) and dbHiMo analyses provided a consistent classification of 3D7.g7031  
121 as Sas2 (KAT8) and 3D7.g9281 as Esa1 (KAT5). However, the classification of 3D7.g4263 was  
122 conflicting since dbHiMo predicted it to be Esa1, while the BLASTp analysis classified it as a Sas3  
123 protein. To properly classify KAT orthologues, a phylogenetic tree was constructed using KATs  
124 of the MYST family from different fungal species. The phylogenetic analysis showed that  
125 3D7.g4263 clusters with Sas3 (KAT6) protein orthologues, that 3D7.g7031 is a Sas2 orthologue,  
126 and that 3D7.g9281 is an Esa1 orthologue (Figure 1A; Table S2; Table 1). We identified the  
127 expected MOZ/SAS domain and the MYST family zinc finger domain in the *Z. tritici* orthologues  
128 of Esa1 and Sas2 using HMMER (Figure 1C). In addition to these two domains, Esa1 harbors an  
129 RNA-binding domain near the N-terminus. Sas3 is the largest protein identified and contains two  
130 MOZ/SAS domains next to a MYST family zinc finger domain and a plant homeodomain (PHD) -  
131 finger domain.

132 The phylogenetic analysis of KATs of the GNAT family indicated that 3D7.g2851, 3D7.g4775 and  
133 3D7.g8500 cluster with Ngs1, Gcn5 (KAT2) and Elp3 (KAT9) proteins, respectively (Figure 1B;  
134 Table S2; Table 1). All the identified KAT orthologues belonging to the GNAT family contain a  
135 GNAT acetyltransferase domain. Gcn5 additionally has a bromodomain in its C-terminal region,  
136 while the Elp3 orthologue contains 2 radical SAM domains. Ngs1 contains a glycosyl hydrolase  
137 family 3 (GH3) domain (Figure 1C), as previously described for orthologues of this KAT in other  
138 organisms (27).

## 139 2.2 KAT genes in *Z. tritici* are differentially expressed during plant infection

140 We hypothesized that KATs involved in effector gene regulation might be expressed during plant  
141 infection and they might exhibit a similar expression pattern as effector genes. Therefore, we  
142 performed a transcriptomic analysis of the genes encoding the identified KATs and compared  
143 them with the expression of three effector genes formerly shown to be epigenetically regulated  
144 (10): *Avr3D1* (24), *AvrStb6* (25) and *Mycgr3G76589* (28). For this purpose, we used data from  
145 previously published RNA-seq studies (23, 29). The MYST family orthologues (*Esa1*, *Sas2* and  
146 *Sas3*) were expressed during host colonization, displaying low expression levels at the beginning  
147 of the infection and a peak of expression at 12-14 days post-infection (dpi). The three GNAT  
148 family members were also expressed during host colonization, *Elp3* exhibiting the lowest  
149 expression levels at 14 dpi (Figure 2). Based on the different gene expression patterns of the KAT  
150 members, we hypothesized that they might have distinct roles in growth, development, and  
151 virulence.

## 152 2.3 Histone acetylation levels in effector loci increase during plant infection

153 To evaluate the changes in acetylation of H3K9 and H3K14 during plant infection in effector loci,  
154 we performed a chromatin immunoprecipitation assay followed by quantitative PCR (ChIP-  
155 qPCR). We infected wheat plants with *Z. tritici* and harvested the second leave at 11 dpi, which  
156 is approximately the time point at which maximum levels of effector transcripts can be observed  
157 (Figure 2; (10)). We additionally analyzed histone acetylation in *Z. tritici* grown under axenic  
158 conditions. We evaluated the acetylation levels of H3K9 and H3K14 in different regions of  
159 *AvrStb6*: 1000 base pairs (bp; -1000), 500 bp (-500), 300 bp (-300) and 50 bp (-50) upstream of  
160 the start codon, and within the open reading frame region (ORF). We also evaluated the  
161 acetylation of these two marks 300 bp upstream of the start codon of *Avr3D1*. A TFIIIC  
162 transcription factor complex unit (*3D7.g8520*; *TFIIIC*) was used as control. As expected (30, 31),  
163 the acetylation levels of the control and *AvrStb6* (-1000) remained stable *in planta* compared to  
164 axenic conditions. We observed an increase in the acetylation levels of H3K9 and H3K14 at the  
165 loci of the effector genes *Avr3D1* and *AvrStb6* (Figure 3). The ChIP-qPCR results support a  
166 possible role of histone acetylation in the activation of effector genes during infection.

## 167 2.4 KAT orthologues in *Z. tritici* are involved in growth and colony development

168 To determine the function of the KAT orthologues of *Z. tritici* in development and virulence, we  
169 obtained loss-of-function mutants in the genes *Sas2*, *Sas3*, *Ngs1*, *Gcn5* and *Elp3*. We first  
170 determined the role of the investigated KATs in development. We measured the area of colonies  
171 of the KAT mutants grown on yeast-malt-sucrose agar (YMA; Figure S1).  $\Delta$ *Sas3* and  $\Delta$ *Gcn5*

172 colonies were significantly smaller than colonies of the control. Interestingly,  $\Delta Sas2$  lines  
173 displayed the opposite phenotype, with larger colony diameters than the controls, most likely  
174 due to their hyphal-like growth, as observed on the colony edges (Figure S1). We therefore  
175 suggest that *Sas2*, *Sas3* and *Gcn5* might be involved in growth and/or development, with *Sas2*  
176 probably being a negative regulator of growth and hyphal switch.

177 We addressed the role of the KATs in stress tolerance by assessing the performance of the  
178 mutants under different stresses, including high temperature (28°C), salt (NaCl; 0.5 M), H<sub>2</sub>O<sub>2</sub> (1  
179 mM), osmotic (sorbitol; 1 M) and cell wall (Calcofluor white; 200 ng· $\mu$ L<sup>-1</sup>, and Congo red; 2  
180 mg·mL<sup>-1</sup>) stresses on YMA. Additionally, we quantified growth in the presence of different  
181 carbon sources, such as fructose (5 g·L<sup>-1</sup>), galactose (50 mM), N-acetylglucosamine (GlcNAc, 2.5  
182 mM), and glucose (2.5 mM) in a nutrient poor minimal medium (MM). Colony development of  
183 the mutants was compared with growth under standard conditions (YMA 18°C) and to the  
184 control line (3D7-GFP).  $\Delta Sas3$  colonies were smaller than those of the control line under all the  
185 conditions, supporting the role of *Sas3* in growth and/or development. The other tested mutants  
186 grew similarly to 3D7-GFP under all the stress conditions, except for  $\Delta Gcn5$  and  $\Delta Ngs1$ , which  
187 were slightly more resistant to Congo red than the control line (Figure S2). Therefore, we  
188 concluded that *Z. tritici* KATs are not positive regulators of stress tolerance.

#### 189 2.5 Sas3 and Gcn5 are involved in virulence

190 We further investigated the role of KATs in host colonization on the susceptible wheat cultivar  
191 Runal (Figure 4; Figures S3 and S4). All the KAT mutants developed a similar biomass to that of  
192 the control at 10 dpi, except for  $\Delta Sas3$  and  $\Delta Ngs1$ , which had a significantly lower biomass  
193 (Figure 4A). However, at shorter time points (6 dpi),  $\Delta Sas3$  grew to similar levels as the control  
194 (Figure 4B; Figure S5). In accordance with the reduction in biomass,  $\Delta Sas3$  developed less  
195 disease symptoms, as determined by the percentage of leaf area covered by lesions (PLACL),  
196 and less pycnidia (Figure 4; Figures S3 and S6). Additionally, we observed a slightly faster  
197 production of symptoms by the mutant  $\Delta Gcn5$  (Figure 4D; Figures S4 and S6). Nevertheless, this  
198 faster spread of disease symptoms did not lead to a higher production of pycnidia. Instead, we  
199 observed that  $\Delta Gcn5$  generated very few pycnidia (Figure 4E; Figures S4, S6 and S7).  $\Delta Elp3$   
200 showed a slight reduction in pycnidia production per leaf lesion at 20 dpi (Figure 4E; Figure S4),  
201 suggesting a contribution of *Elp3* to asexual reproduction. Additionally,  $\Delta Sas2$  showed a slightly  
202 altered infection phenotype, manifested by red/orange spots on infected leaves, but no  
203 differences in PLACL or in pycnidia production were detected (Figure 4; Figures S3 and S6).  
204 Overall, *Gcn5* and *Sas3* disruption led to the highest effect on virulence and/or pycnidia

205 production. To confirm that the observed phenotype of  $\Delta Gcn5$  and  $\Delta Sas3$  was due to the  
206 disruption of the KAT genes, we obtained complementation lines which expressed the wildtype  
207 version of *Gcn5* and *Sas3* in the mutant backgrounds. We observed a restoration of virulence  
208 and pycnidia production in both complementation lines (Figure S7). These results demonstrate  
209 that *Sas3* is involved in virulence and that *Sas3* and *Gcn5* mediate pycnidia formation, indicating  
210 the key role of *Z. tritici* KATs in virulence and reproduction.

## 211 2.6 KAT mutants are impaired in expression regulation of effector genes under axenic conditions

212 We next determined the role of *Z. tritici* KATs in regulation of the infection machinery by  
213 analyzing the expression levels of the effector genes *Avr3D1*, *AvrStb6* and *Mycgr3G76589* by  
214 qRT-PCR under axenic conditions. The expression of *Avr3D1* was drastically reduced in  $\Delta Sas3$   
215 (Figure 5A), and the expression of *AvrStb6* was reduced in  $\Delta Sas2$ ,  $\Delta Sas3$  and  $\Delta Gcn5$  (Figure 5B)  
216 under axenic conditions. *Mycgr3G76589* expression was unchanged in the mutants (Figure S8).

217 To determine the role of the investigated KATs in effector gene regulation at the cellular level,  
218 we disrupted the KAT genes in a reporter line that harbors His1-mCherry located at the *AvrStb6*  
219 locus, and under the control of the *AvrStb6* promoter (10). The fusion of histone 1 (His1) with  
220 mCherry enabled its nuclear localization and allowed monitoring *AvrStb6* expression at the  
221 cellular level. In the control reporter line growing under axenic conditions, mCherry was  
222 detected, indicating that the *AvrStb6* promoter is partially active when *Z. tritici* grows in the  
223 absence of the host (Figures 5C and 2).  $\Delta Ngs1$  and  $\Delta Elp3$  showed the same expression pattern  
224 as the control (Figures 5F and 5H), while  $\Delta Sas2$ ,  $\Delta Sas3$  and  $\Delta Gcn5$  showed a decrease in the  
225 levels of mCherry accumulation under axenic conditions (Figures 5D, 5E and 5G). These results  
226 confirmed that *Z. tritici* *Sas2*, *Sas3* and *Gcn5* are involved in effector gene regulation under  
227 axenic conditions.

## 228 2.7 Effector gene expression is altered during plant infection in the KAT mutants

229 Effector genes are key for plant colonization and highly induced during infection (Figure 2). We  
230 hypothesized that histone acetylation might be required for effector gene upregulation. We  
231 determined the expression levels of 4 effector genes (*Avr3D1* (3D7.g7883 reannotated in (24)),  
232 *AvrStb6* (3D7.g5586), *AvrStb9* (3D7.g741; (32)), and *Mycgr3G76589* (3D7.g10118)) by qRT-PCR  
233 during plant infection in KAT knockouts (Figure 6). The expression levels of *Avr3D1* and *AvrStb6*  
234 were higher in  $\Delta Ngs1$  and  $\Delta Gcn5$ , while *AvrStb6* expression was reduced in  $\Delta Sas2$  and  $\Delta Sas3$  at  
235 10 dpi (Figures 6A and 6B). We also observed reduced expression of *Mycgr3G76589* in all  
236 mutants except  $\Delta Gcn5$  (Figure 6D) and a reduction of *AvrStb9* expression in  $\Delta Sas3$  (Figure 6C).



237 These results suggest that KATs are involved in infection and in the proper regulation of effector  
238 gene expression during early stages of plant colonization.

239 The above qRT-PCR analyses do not resolve expression levels in individual cells. The reporter line  
240 harboring the mCherry gene expressed under the control of the *AvrStb6* promoter and located  
241 in the *AvrStb6* locus enabled us to monitor the *AvrStb6* expression pattern at the cellular level.  
242 Confocal microscopy pictures were taken at 6 dpi to maximize the number of penetration events  
243 of *Z. tritici*, while minimizing the autofluorescence produced by plants at later time points of the  
244 infection. The *AvrStb6* promoter shows little activity during hyphal growth on the plant surface  
245 but is strongly activated in hyphae approaching the stomata (Figure 6D), as previously  
246 demonstrated (10). We investigated whether this expression pattern was mediated by KATs.  
247 Remarkably, all the analyzed mutants grew as hyphae on the leaf surface and reached leaf  
248 stomata. Interestingly, at 6 dpi,  $\Delta$ *Sas3* showed only minimal activation of the *AvrStb6* promoter  
249 even in hyphae attempting to penetrate the stomata (Figure 6F), which confirms the previous  
250 observation of *Sas3* being involved in effector gene regulation during infection. On the other  
251 hand, the activity of the *AvrStb6* promoter in  $\Delta$ *Elp3* was higher than in the control regardless of  
252 the proximity to stomata (Figure 6I).  $\Delta$ *Sas2*,  $\Delta$ *Ngs1* and  $\Delta$ *Gcn5* displayed a similar *AvrStb6*  
253 expression pattern than the control at 6 dpi (Figures 6E, 6G and 6H). The results demonstrate  
254 that *Sas3* is involved in effector gene upregulation during stomata penetration in *Z. tritici*.

### 255 2.8 Sas3 contributes to H3K9 and H3K14 acetylation of effector loci during plant infection

256 We subsequently evaluated whether *Sas3*-mediated expression regulation of effector genes is  
257 associated with histone acetylation during plant infection. We determined the acetylation levels  
258 of H3K9 and H3K14 during wheat infection in  $\Delta$ *Sas3* lines. We observed a reduction in the  
259 relative acetylation levels of H3K9 (Figure 7A) and H3K14 (Figure 7B) in the *AvrStb6* promoter  
260 region and in *Avr3D1* in  $\Delta$ *Sas3* compared to the control line during plant infection. As expected,  
261 acetylation levels of H3K9 and H3K14 in the control locus (*TFIIIC*) and 1000 bp upstream of the  
262 start codon of *AvrStb6* were not affected by the *Sas3* deletion. These results demonstrate that  
263 *Sas3* is involved in plant-associated acetylation of H3K9 and H3K14 in effector loci. We suggest  
264 that the reduced effector transcript levels and the hindered infection of  $\Delta$ *Sas3* (Figures 4 and 6)  
265 might be due to a reduction in histone acetylation (Figure 7).

### 266 3. DISCUSSION

267 Exploring the mechanisms by which plant pathogens activate their infection machinery is key  
268 for understanding how the interaction between the host and the pathogen is established. In the  
269 past years, chromatin remodeling has been shown to be crucial for effector gene activation  
270 during plant infection (10, 11, 13, 33). However, the specific chromatin modifications that are  
271 involved in this activation remain largely unknown. In this work we investigated the role of KATs  
272 and histone acetylation in the virulence of the fungal plant pathogen *Z. tritici*. We demonstrated  
273 that Sas3-mediated histone acetylation dynamics are associated with upregulation of effector  
274 genes during plant infection.

275 A total of three KATs from the MYST family were identified in *Z. tritici*, Sas3, Sas2 and Esa1. We  
276 showed that Sas3 and Sas2 are involved in the expression regulation of well-characterized  
277 effector genes, such as *AvrStb6*. Although Sas2 did not affect asexual reproduction and the  
278 speed at which necrotic lesions developed, it clearly shaped the visual appearance of lesions,  
279 manifested by red-orange spots in lesions produced in infections by the  $\Delta$ Sas2 mutant. We  
280 considered that this altered symptom development might be the result of misexpression of  
281 *AvrStb6* and potentially other effector genes in the  $\Delta$ Sas2 mutant. Likewise, the Sas2 orthologue  
282 in *B. cinerea* (BcSas2) is involved in regulation of virulence (34), suggesting a conserved role of  
283 Sas2 in effector gene activation in fungal pathogens. Disruption of *Sas3* in *Z. tritici* led to a  
284 reduction of virulence and pycnidia formation. Similarly, Sas3 from *M. oryzae* is involved in  
285 virulence (18). We additionally noticed that Sas3 is required for normal growth under axenic  
286 conditions since colony size was reduced in  $\Delta$ Sas3. Although this reduction in growth could  
287 indirectly lead to a reduction of virulence, we suggest that Sas3 is directly involved in the  
288 regulation of virulence since (i)  $\Delta$ Sas3 grows as hyphae on the leaf surface of wheat and are able  
289 to reach the stomata, (ii) *AvrStb6* activation is impaired in the proximity to the stomata in  $\Delta$ Sas3  
290 mutants, and (iii) misactivation of effector genes occurs at stages of infection when the fungal  
291 biomass is similar to the control (6 dpi). Thus, we believe that the impaired virulence of  $\Delta$ Sas3  
292 mutants is most likely a consequence of effector gene misregulation, featuring reduced  
293 expression levels of *AvrStb6*, *AvrStb9*, and *Mycgr3G76589* during plant infection, highlighting  
294 the contribution of Sas3 in the activation of effector genes. (30). Remarkably, mutants in Sas3  
295 are impaired in histone acetylation of effector genes during plant infection, suggesting that Sas3-  
296 mediated acetylation is a crucial mechanism driving the transcriptional reprogramming of  
297 effector genes during plant infection *Z. tritici* (16).

298 We identified three members of the GNAT KAT family in *Z. tritici*, with distinct roles in the  
299 infection cycle. Expression analysis of effector genes in GNAT mutants revealed that GNATs

300 might be involved in negatively regulating effector genes. However, GNATs might not directly  
301 regulate effector genes but rather other transcriptional regulators. We suggest that in  $\Delta Gcn5$   
302 the higher expression levels of effector genes might lead to faster development of necrosis. This  
303 might be due to two possible scenarios. The high accumulation of effectors might lead to an  
304 early recognition of the pathogen by the host, resulting in a strong immune response which  
305 might be manifested by cell death. Alternatively, misregulation of cell-death inducing effectors  
306 might directly produce necrosis at earlier stages of the infection. Additionally, we showed that  
307 Gcn5 is involved in asexual reproduction since the knockout mutant developed relatively few  
308 pycnidia. Interestingly, Gcn5 negatively regulates symptom development but positively  
309 regulates reproduction, supporting that different mechanisms govern virulence and pycnidia  
310 production, as previously shown (23).

311 H3K9 and H3K14 acetylation are well-known euchromatic marks (35). Accordingly, we observed  
312 an increase in histone acetylation levels in *Avr3D1* and *AvrStb6* during plant infection, along with  
313 the derepression of these two effector genes. We suggest that this increase in histone  
314 acetylation levels contributes to the *in planta*-specific upregulation of effector genes in *Z. tritici*.  
315 Previously, we reported a decrease in the levels of H3K27 and H3K9 trimethylation in effector  
316 loci during plant infection associated with effector gene depression (10). We consider that this  
317 reduction of histone repressive marks and an increase in activating marks, such as those  
318 described in the current work, promote a local switch from repressive to permissive chromatin,  
319 allowing the access of nucleosome remodeling complexes and structural modifications in  
320 chromatin, including decondensation of the chromatin fiber. Previous work demonstrated that  
321 for selected effector genes, such changes in chromatin structure are very local and do not affect  
322 neighboring loci (10), suggesting the targeted location of KATs to effector loci during plant  
323 infection. Substrate specificities have been reported to be mediated by certain subunits from  
324 KAT complexes or KAT domains that interact with nucleosomes (36). In *Z. tritici*, a bromodomain  
325 and a PHD-finger domain were identified in Gcn5 and Sas3, respectively, both with a potential  
326 role in substrate specificity or in interaction with regulatory proteins (37). In addition, the  
327 concerted expression of effector genes during plant infection most likely requires altered  
328 transcription factor activities or levels, as demonstrated for the Zn2Cys6 family member  
329 transcription factor Pf2 from *L. maculans*. In this case, the coordinated action of trimethylation  
330 of H3K9 and Pf2 governs the specific expression pattern of effector genes (38). Accordingly, we  
331 propose that chromatin modifications and still unknown transcription factors might jointly act  
332 as derepressors of effector genes of *Z. tritici* during plant infection.

333 We have shown that histone modifications, involving acetylation and demethylation (10),  
334 mediate the activation of effector genes during plant infection. Elucidating the crosstalk  
335 between histone modifications, their direct or indirect function in effector gene regulation and  
336 the role of classic transcriptional activators and repressors will help us to further understand the  
337 molecular mechanisms linking chromatin and stage-specific transcriptional changes. Future  
338 work aiming to unveil global changes in histone acetylation and methylation patterns during  
339 plant infection will shed more light on the contribution of these histone marks to the regulation  
340 of the infection machinery.

#### 341 **4. MATERIALS AND METHODS**

##### 342 4.1 Fungal and bacterial strains used

343 We used the *Z. tritici* Swiss strain ST99CH\_3D7 ((39); abbreviated as 3D7). All mutants were  
344 obtained either in 3D7 expressing the codon optimized version of the enhanced green  
345 fluorescent protein (eGFP) (3D7-GFP; (10, 40)), or in a mutant reporter line that expresses  
346 *mCherry* fused to His1 under the control of the *AvrStb6* promoter and located within the *AvrStb6*  
347 locus (10). Stellar *Escherichia coli* HST08 cells (Takara Bio, Japan) and the *Agrobacterium*  
348 *tumefaciens* strain AGL1 were used for cloning and *Z. tritici* transformation, respectively.

##### 349 4.2 Bioinformatic tools

350 To identify and classify the KAT orthologues from *Z. tritici*, we first used the basic local alignment  
351 search tool (BLAST; (41)) from the National Centre for Biotechnology Information (NCBI) using  
352 the previously characterized KAT protein sequences from *S. cerevisiae* as queries (Table S1).  
353 Reverse BLAST was also performed to confirm that the identified protein sequences in *Z. tritici*  
354 were KAT orthologues. In parallel, we used the dbHiMo web-based data browser (26). Results  
355 obtained in the BLAST analysis were compared with results using dbHiMo to confirm that the  
356 same KATs were found in both cases. We obtained a multiple sequence alignment of the KAT  
357 orthologues (MUSCLE; (42)) and a phylogenetic tree. The protein sequences used for  
358 constructing the phylogenetic tree were obtained from NCBI (Table S2). Phylogenetic trees were  
359 constructed using the Molecular Evolutionary Genetics Analysis (MEGA-X 10.2; (43)) software,  
360 applying the maximum likelihood (ML) method with 1000 non-parametric bootstraps as  
361 statistical support. Trees were rooted using the midpoint rooting method. We edited the trees  
362 using the Interactive Tree Of Life (iTOL; (44)) software. Additionally, we identified protein  
363 domains in *Z. tritici* HMEs using HMMER (45) including all databases (Pfam, TIGRFAM, Gene3D,  
364 Superfamily, PIRSF and TreeFam) and represented the different protein domains using the R  
365 package “ragp” (46).

### 366 4.3 Generation of *Z. tritici* transformants

367 Plasmids for targeted gene deletion by homologous recombination were assembled using the  
368 In-Fusion® HD Cloning Kit (Takara Bio, Japan). Briefly, the nourseothricin resistance gene PCR-  
369 amplified from pES1-NAT-GFP (47) was flanked by homology arms of ca. 1 kb and inserted into  
370 the KpnI-SbfI-linearized acceptor plasmid pCGEN (48). Similarly, constructs for genetic  
371 complementation were generated by assembling gene sequences spanning from ca. 1 kb  
372 upstream of the start codon to right before the stop codon and the C-terminal 4xMyc-tag (49)  
373 into XhoI-linearized pLM1. Primers are listed in Table S3. *Z. tritici* gene deletion mutants and  
374 respective complementation mutants were obtained by *A. tumefaciens*-mediated  
375 transformation as previously described (10, 50) using nourseothricin (25 µg·mL<sup>-1</sup>) and  
376 hygromycin (100 µg·mL<sup>-1</sup>) for selection, respectively. Despite the presence of homology arms in  
377 the T-DNA, transformation of *Z. tritici* typically yields high frequencies of ectopic insertions by  
378 non-homologous end-joining instead of or in addition to targeted insertions by homologous  
379 recombination. To distinguish deletion mutants from ectopic insertion mutants, a PCR-based  
380 mutant screening was performed using either purified genomic DNA as template or directly  
381 adding liquid culture to the PCR reaction. The screening method includes a primer binding site  
382 present between the nourseothricin resistance gene and the downstream homology arm. The  
383 sequence of this screening primer binding site was chosen to match the sequence of the gene  
384 to be deleted in a way that yields two distinct amplicons in deletion and ectopic insertion  
385 mutants when combined with a primer binding site located in the region downstream of the  
386 homology arm (Figure S9). Since this screening method yields distinct amplicons for both  
387 deletion and ectopic insertion mutants, failed PCR reactions can easily be identified by the lack  
388 of both amplicons. Furthermore, the presence of both amplicons in the same reaction allows  
389 the identification of impure mutant lines and heterokaryons. Insertion copy numbers were  
390 determined by qPCR and mutant lines with multiple inserts were discarded. At least two  
391 independent lines were obtained per mutant and used for subsequent experiments.

### 392 4.4 Infection assays

393 Infection assays were performed on wheat (*Triticum aestivum* L.) plants of cultivar Runal grown  
394 for 15 days at 18°C during the day and 15°C during the night, with 16 hours of light and 65% of  
395 relative humidity. Sixteen seeds of cultivar Runal were sown in 11x11x12 cm pots with a peat-  
396 based substrate. Plants were fertilized after one week (Universal fertilizer, COMPO, Münster,  
397 Germany). The fungal inoculum was prepared one week before the infection by inoculating 50-  
398 100 µL of glycerol stock in 50 mL of on yeast extract-peptone-dextrose broth (YPD; yeast extract

399 10 g·L<sup>-1</sup>; peptone 20 g·L<sup>-1</sup>; dextrose 20 g·L<sup>-1</sup>) amended with kanamycin (50 µg·mL<sup>-1</sup>). Spore  
400 suspensions were prepared as described (24) and quantified using a BLAUBRAND bright-line  
401 Neubauer improved hemocytometer (0.100 mm depth, 0.0025 mm<sup>2</sup> area; Brand, Wertheim,  
402 Germany), except for the ChIP-qPCR experiment in which we used the Spore Counter macro vs  
403 2.13 (<https://github.com/jalassim/SporeCounter.git>; Julien Alassimone; ETH-Zürich,  
404 Switzerland).

405 Wheat infection assays were performed using fungal suspensions at a concentration of 10<sup>7</sup>  
406 spores·mL<sup>-1</sup> in 0.1% Tween-20 as previously described (24). Each pot was sprayed either with  
407 12.5 mL 0.1% Tween-20 for mock treatment or 12.5 mL spore suspension for controls and  
408 mutants. At least two independent mutant lines were used to evaluate symptom development  
409 and pycnidia production. Symptoms produced by *Z. tritici* were analyzed on the second leaf at  
410 two different time point using ImageJ (51) and an automated image analysis method (52). The  
411 percentage of leaf aPLACL and pycnidia counts per square centimeter of lesion were used as  
412 proxy for virulence and asexual reproduction, respectively.

#### 413 4.5 Developmental assays

414 We performed fitness assays with *Z. tritici* mutants. A 3-µL drop of *Z. tritici* spore suspensions at  
415 10<sup>6</sup>, 10<sup>5</sup>, 10<sup>4</sup> and 10<sup>3</sup> spores·mL<sup>-1</sup> was placed on different types of media: YMA, YMA  
416 supplemented with NaCl (0.5 M), H<sub>2</sub>O<sub>2</sub> (1 mM), sorbitol (1 M), calcofluor white (200 ng·µL<sup>-1</sup>), or  
417 Congo red (2 mg·mL<sup>-1</sup>); minimal medium (MM; Voguel's medium (53)), and MM supplemented  
418 with fructose (5 g·L<sup>-1</sup>), galactose (50 mM), GlcNAc (2.5 mM), or glucose (2.5 mM). Inoculated  
419 agar plates were incubated at 18°C. An additional plate of YMA was incubated at 28°C. Pictures  
420 were taken after 6 days.

421 Area of individual colonies of the mutants was estimated by inoculating ca. 100 colony-forming  
422 units on YMA. Three independent replicates of each mutant were performed. After 5 days of  
423 incubation at 18°C, pictures of the plates were taken, and the colony size was analyzed using  
424 ImageJ.

#### 425 4.6 Confocal laser scanning microscopy assays

426 Confocal assays were performed on a Zeiss LSM 880 super-resolution confocal microscope with  
427 fast Airyscan. The emission settings were: 511 to 564 nm for the eGFP channel, 603 to 623 nm  
428 for the mCherry channel, 460 to 480 nm for the mTurquoise2 channel and 692 to 697 nm for the  
429 chloroplast detection. For excitation, an argon (488 nm) laser was used for track 1 (mCherry,  
430 and chloroplasts) and a diode laser (405 nm) was used for track 2 (mTurquoise2 and eGFP).

431 Image processing was performed using Fiji (54) and included generation of maximum-intensity  
432 Z-projections for merging channels and addition of calibration bars. Colors were selected  
433 manually to facilitate channel identification. At least two independent lines per transformant  
434 were used. Experiments were performed at least twice.

#### 435 4.7 Effector gene expression analysis

436 Axenically grown cultures obtained as described above were filtered through a nylon membrane  
437 and centrifuged at 5000 g, 4°C for 5 minutes. Supernatant was discarded and fungal pellets were  
438 ground in liquid N<sub>2</sub>, using mortar and pestle. Infected plant tissue was collected at 6- and 10-  
439 days post infection (dpi). Eight centimeters of second leaves (after discarding 2 cm from the tip)  
440 were used for RNA extraction. Each replicate consisted of 2 leaves. At least three biological  
441 replicates were analyzed per treatment. RNA was extracted with Trizol (Life Technologies),  
442 purified (RNAeasy Mini Kit, QIAGEN Inc., The Netherlands) and treated with DNase (QIAGEN Inc.,  
443 The Netherlands). cDNA was synthesized by using the Primescript RT reagent kit (Takara Bio,  
444 Japan). qPCR was performed in a LightCycler480 II (Roche Diagnostics International AG,  
445 Rotkreuz, Switzerland) using the primers listed in Table S3, and data were analyzed with the  
446 LightCycler 480 software (Roche Diagnostics International AG, Rotkreuz, Switzerland) using  
447 *histone H3* (3D7.g6784) and *beta tubulin* (3D7.g2064) as reference genes. Relative fungal  
448 biomass *in planta* was calculated by dividing the transcript values of fungal housekeeping genes  
449 (histone H3 and beta tubulin) and the plant housekeeping gene *TaCDC48* (*Triticum aestivum* cell  
450 division control protein 48 homolog E-like; *Traes4A02G035500*) (55).

#### 451 4.8 Chromatin extraction and immunoprecipitation (ChIP)

452 For *in vitro* chromatin extraction 150 mg of tissue were used, while for *in planta* chromatin  
453 extraction 250 mg of tissue were used. The micrococcal nuclease (M0247S; New England  
454 Biolabs, Ipswich, MA, USA) reaction was performed at 37°C for 20 minutes. Chromatin fixation,  
455 immunoprecipitation and de-crosslinking were performed as previously described (9, 10).  
456 Antibodies anti-H3 (ab1791, Abcam, Cambridge, UK), anti-H3K9ac (ab10812, Abcam, Cambridge,  
457 UK) and anti-H3K14ac (ab52946, Abcam, Cambridge, UK) were applied in 1:200 ratio.  
458 Subsequent qPCR was carried out on a LightCycler 480 instrument (Roche Diagnostics  
459 International AG, Rotkreuz, Switzerland). Acetylation levels were estimated as relative levels of  
460 H3K9ac and H3K14ac normalized to histone H3 as previously described (56, 57).

#### 461 4.9 Statistics

462 Statistical analysis and graphic representations were performed using either RStudio version  
463 1.4.1717 (58) or GraphPad Prism 8.0.2 for Windows (GraphPad Software, San Diego, California).  
464 For conducting the statistical analyses, Gaussian distribution of the data was tested using a  
465 Shapiro-Wilk normality test and homogeneity of variances was analyzed using a Brown-Forsythe  
466 test. If the data followed a normal distribution and preserved homoscedasticity, the parametric  
467 ordinary one-way ANOVA test was applied together with Fisher's LSD test ( $p$ -value  $< 0.05$ ). If the  
468 aforementioned assumptions were not met, the non-parametric Kruskal-Wallis test was applied  
469 together with Dunn's uncorrected test ( $p$ -value  $< 0.05$ ). In the case of ChIP data, two-way ANOVA  
470 and Bonferroni analyses were performed ( $p$ -value  $< 0.05$ ). All raw data used for performing main  
471 text and supplementary figures are available in Dataset S1 and S2, respectively.

#### 472 **5. ACKNOWLEDGEMENTS**

473 We would like to specially thank Javier Barrero, Pedro Crevillen and Jose Antonio Abelenda for  
474 their support and help with ChIP experiments and results interpretation. We would like to thank  
475 Thierry Marcel and Reda Amezrou for providing us with nonpublished information and to Julien  
476 Alassimone for providing us the Spore Counter macro. We thank Gero Steinberg for providing  
477 us with the vector containing the codon-optimized eGFP and 3D7-GFP, Jason Rudd for providing  
478 the vector PCGEN and Manuel Ene Ordorica for providing the 4xmyc sequence. We thank the  
479 Zymoseptoria laboratory at the CBGP for their help and support. We thank DSP Ltd (Delley,  
480 Switzerland) for providing us wheat seeds. The research was financed by the Ministry of Science  
481 and Innovation (Grant PID2019-108693RA-I00 financed by MICIN/AEI/ to AS-V). ASV was  
482 recipient of Ramon y Cajal grant RYC2018-025530-I of Spanish Ministry of Science, Innovation  
483 and Universities (MCIN/AEI/ and EI FSE). MSF was recipient of Margarita Salas financed by the  
484 European Union - Next Generation EU (Grant MARSALAS21-31).

#### 485 **6. DATA AVAILABILITY STATEMENT**

486 The authors declare that the raw data of all the experiments are included in supplemental  
487 material (Datasets S1 and S2).



488 **7. REFERENCES**

- 489 1. Zeilinger S, Gupta VK, Dahms TES, Silva RN, Singh HB, Upadhyay RS, Gomes EV, Tsui  
490 CKM, Chandra Nayak S. 2016. Friends or foes? Emerging insights from fungal  
491 interactions with plants. *FEMS Microbiol Rev* 40:182.
- 492 2. Horbach R, Navarro-Quesada AR, Knogge W, Deising HB. 2011. When and how to kill a  
493 plant cell: infection strategies of plant pathogenic fungi. *J Plant Physiol* 168:51–62.
- 494 3. Rothbart SB, Strahl BD. 2014. Interpreting the language of histone and DNA  
495 modifications. *Biochim Biophys Acta Gene Regul Mech* 1839:627–643.
- 496 4. Strahl BD, David Allis C. 2000. The language of covalent histone modifications. *Nature*  
497 403:41–45.
- 498 5. Möller M, Ridenour JB, Wright DF, Freitag M. 2022. H4K20me3 controls Ash1-mediated  
499 H3K36me3 and transcriptional silencing in facultative heterochromatin. *bioRxiv*  
500 2022.11.25.517763.
- 501 6. Rando OJ, Winston F. 2012. Chromatin and transcription in yeast. *Genetics* 190:351–  
502 387.
- 503 7. Sterner DE, Berger SL. 2000. Acetylation of histones and transcription-related factors.  
504 *Microbiology and Molecular Biology Reviews* 64:435–459.
- 505 8. Freitag M. 2017. Histone methylation by SET domain proteins in fungi. *Annu Rev*  
506 *Microbiol* 71:413–439.
- 507 9. Soyer JL, Möller M, Schotanus K, Connolly LR, Galazka JM, Freitag M, Stukenbrock EH.  
508 2015. Chromatin analyses of *Zymoseptoria tritici*: Methods for chromatin  
509 immunoprecipitation followed by high-throughput sequencing (ChIP-seq). *Fungal*  
510 *Genetics and Biology* 79:63–70.
- 511 10. Meile L, Peter J, Puccetti G, Alassimone J, McDonald BA, Sánchez-Vallet A. 2020.  
512 Chromatin dynamics contribute to the spatiotemporal expression pattern of virulence  
513 genes in a fungal plant pathogen. *mBio* 11:e02343-20.
- 514 11. Zhang W, Huang J, Cook DE. 2021. Histone modification dynamics at H3K27 are  
515 associated with altered transcription of *in planta* induced genes in *Magnaporthe*  
516 *oryzae*. *PLoS Genet* 17:e1009376.
- 517 12. Soyer JL, el Ghalid M, Glaser N, Ollivier B, Linglin J, Grandaubert J, Balesdent MH,  
518 Connolly LR, Freitag M, Rouxel T, Fudal I. 2014. Epigenetic control of effector gene  
519 expression in the plant pathogenic fungus *Leptosphaeria maculans*. *PLoS Genet*  
520 10:e1004227.
- 521 13. Chujo T, Scott B. 2014. Histone H3K9 and H3K27 methylation regulates fungal alkaloid  
522 biosynthesis in a fungal endophyte-plant symbiosis. *Mol Microbiol* 92:413–434.
- 523 14. Lee KK, Workman JL. 2007. Histone acetyltransferase complexes: One size doesn't fit  
524 all. *Nat Rev Mol Cell Biol* 8:284–295.
- 525 15. González-Prieto JM, Rosas-Quijano R, Domínguez A, Ruiz-Herrera J. 2014. The *UmGcn5*  
526 gene encoding histone acetyltransferase from *Ustilago maydis* is involved in  
527 dimorphism and virulence. *Fungal Genetics and Biology* 71:86–95.

- 528 16. Nützmann HW, Reyes-Dominguez Y, Scherlach K, Schroeckh V, Horn F, Gacek A,  
529 Schümann J, Hertweck C, Strauss J, Brakhage AA. 2011. Bacteria-induced natural  
530 product formation in the fungus *Aspergillus nidulans* requires Saga/Ada-mediated  
531 histone acetylation. *Proc Natl Acad Sci U S A* 108:14282–14287.
- 532 17. Ma H, Li L, Gai Y, Zhang X, Chen Y, Zhuo X, Cao Y, Jiao C, Gmitter FG, Li H. 2021. Histone  
533 acetyltransferases and deacetylases are required for virulence, conidiation, DNA  
534 damage repair, and multiple stresses resistance of *Alternaria alternata*. *Front Microbiol*  
535 12:783633.
- 536 18. Dubey A, Lee J, Kwon S, Lee YH, Jeon J. 2019. A MYST family histone acetyltransferase,  
537 MoSAS3, is required for development and pathogenicity in the rice blast fungus. *Mol*  
538 *Plant Pathol* 20:1491–1505.
- 539 19. Kong X, van Diepeningen AD, van der Lee TAJ, Waalwijk C, Xu J, Xu J, Zhang H, Chen W,  
540 Feng J. 2018. The *Fusarium graminearum* histone acetyltransferases are important for  
541 morphogenesis, DON biosynthesis, and pathogenicity. *Front Microbiol* 9:654.
- 542 20. Fones H, Gurr S. 2015. The impact of Septoria tritici Blotch disease on wheat: An EU  
543 perspective. *Fungal Genetics and Biology* 79:3–7.
- 544 21. Steinberg G. 2015. Cell biology of *Zymoseptoria tritici*: Pathogen cell organization and  
545 wheat infection. *Fungal Genetics and Biology* 79:17–23.
- 546 22. Sánchez-Vallet A, McDonald MC, Solomon PS, McDonald BA. 2015. Is *Zymoseptoria*  
547 *tritici* a hemibiotroph? *Fungal Genetics and Biology* 79:29–32.
- 548 23. Francisco CS, Ma X, Zwysig MM, McDonald BA, Palma-Guerrero J. 2019. Morphological  
549 changes in response to environmental stresses in the fungal plant pathogen  
550 *Zymoseptoria tritici*. *Sci Rep* 9:1–18.
- 551 24. Meile L, Croll D, Brunner PC, Plissonneau C, Hartmann FE, McDonald BA, Sánchez-Vallet  
552 A. 2018. A fungal avirulence factor encoded in a highly plastic genomic region triggers  
553 partial resistance to septoria tritici blotch. *New Phytologist* 219:1048–1061.
- 554 25. Zhong Z, Marcel TC, Hartmann FE, Ma X, Plissonneau C, Zala M, Ducasse A, Confais J,  
555 Compain J, Lapalu N, Amselem J, McDonald BA, Croll D, Palma-Guerrero J. 2017. A small  
556 secreted protein in *Zymoseptoria tritici* is responsible for avirulence on wheat cultivars  
557 carrying the *Stb6* resistance gene. *New Phytologist* 214:619–631.
- 558 26. Choi J, Kim KT, Huh A, Kwon S, Hong C, Asiegbu FO, Jeon J, Lee YH. 2015. dbHiMo: a  
559 web-based epigenomics platform for histone-modifying enzymes. *Database*  
560 8:2015:bav052.
- 561 27. Su C, Lu Y, Liu H. 2016. N-acetylglucosamine sensing by a GCN5-related N-  
562 acetyltransferase induces transcription via chromatin histone acetylation in fungi. *Nat*  
563 *Commun* 7:12916.
- 564 28. Brunner PC, Torriani SFF, Croll D, Stukenbrock EH, McDonald BA. 2013. Coevolution and  
565 life cycle specialization of plant cell wall degrading enzymes in a hemibiotrophic  
566 pathogen. *Mol Biol Evol* 30:1337–1347.
- 567 29. Palma-Guerrero J, Ma X, Torriani SFF, Zala M, Francisco CS, Hartmann FE, Croll D,  
568 McDonald BA. 2017. Comparative transcriptome analyses in *Zymoseptoria tritici* reveal

- 569 significant differences in gene expression among strains during plant infection.  
570 *Molecular Plant-Microbe Interactions* 30:231–244.
- 571 30. Roh TY, Ngau WC, Cui K, Landsman D, Zhao K. 2004. High-resolution genome-wide  
572 mapping of histone modifications. *Nat Biotechnol* 22:1013–1016.
- 573 31. Roh T-Y, Cuddapah S, Zhao K. 2005. Active chromatin domains are defined by  
574 acetylation islands revealed by genome-wide mapping. *Genes Dev* 19:542–52.
- 575 32. Amezrou R, Audéon C, Compain J, Gélisse S, Ducasse A, SAaintenac C, Lapalu N, Orford  
576 S, Croll D, Amselem J, Fillinger S, Marcel TC. 2022. A secreted protease-like protein in  
577 *Zymoseptoria tritici* is responsible for avirulence on Stb9 resistance gene in wheat.  
578 bioRxiv 2022.10.31.514577.
- 579 33. Soyer JL, Rouxel T, Fudal I. 2015. Chromatin-based control of effector gene expression  
580 in plant-associated fungi. *Curr Opin Plant Biol* 26:51–56.
- 581 34. Wang G, Song L, Bai T, Liang W. 2020. BcSas2-mediated histone H4K16 acetylation is  
582 critical for virulence and oxidative stress response of *Botrytis cinerea*. *Molecular Plant-*  
583 *Microbe Interactions* 33:1242–1251.
- 584 35. Karmodiya K, Krebs AR, Oulad-Abdelghani M, Kimura H, Tora L. 2012. H3K9 and H3K14  
585 acetylation co-occur at many gene regulatory elements, while H3K14ac marks a subset  
586 of inactive inducible promoters in mouse embryonic stem cells. *BMC Genomics* 13:424.
- 587 36. Eberharther A, Becker PB. 2002. Histone acetylation: A switch between repressive and  
588 permissive chromatin. *EMBO Rep* 3:224–229.
- 589 37. Kalkhoven E, Teunissen H, Houweling A, Verrijzer CP, Zantema A. 2002. The PHD type  
590 zinc finger is an integral part of the CBP acetyltransferase domain. *Mol Cell Biol*  
591 22:1961.
- 592 38. Clairet C, Gay EJ, Porquier A, Blaise F, Marais CL, Balesdent M-H, Rouxel T, Soyer JL,  
593 Fudal I. 2021. Regulation of effector gene expression as concerted waves in  
594 *Leptosphaeria maculans*: a two-players game. bioRxiv 2021.12.15.
- 595 39. Linde CC, Zhan J, McDonald BA. 2002. Population structure of *Mycosphaerella*  
596 *graminicola*: from lesions to continents. *Phytopathology* 92:946–955.
- 597 40. Kilaru S, Schuster M, Studholme D, Soanes D, Lin C, Talbot NJ, Steinberg G. 2015. A  
598 codon-optimized green fluorescent protein for live cell imaging in *Zymoseptoria tritici*.  
599 *Fungal Genetics and Biology* 79:125–131.
- 600 41. Altschul SF, Gish W, Miller W, Myers EW, Lipman DJ. 1990. Basic local alignment search  
601 tool. *J Mol Biol* 215:403–410.
- 602 42. Edgar RC. 2004. MUSCLE: multiple sequence alignment with high accuracy and high  
603 throughput. *Nucleic Acids Res* 32:1792–1797.
- 604 43. Tamura K, Stecher G, Kumar S. 2021. MEGA11: Molecular Evolutionary Genetics  
605 Analysis Version 11. *Mol Biol Evol* 38:3022–3027.
- 606 44. Letunic I, Bork P. 2021. Interactive tree of life (iTOL) v5: An online tool for phylogenetic  
607 tree display and annotation. *Nucleic Acids Res* 49:W293–W296.

- 608 45. Potter SC, Luciani A, Eddy SR, Park Y, Lopez R, Finn RD. 2018. HMMER web server: 2018  
609 update. *Nucleic Acids Res* 46:W200–W204.
- 610 46. Dragičević MB, Paunović DM, Bogdanović MD, Todorović SI, Simonović AD. 2021. ragp:  
611 Pipeline for mining of plant hydroxyproline-rich glycoproteins with implementation in  
612 R. *Glycobiology* 30:19–35.
- 613 47. Meile L, Garrido-Arandia M, Bernasconi Z, Peter J, Schneller A, Bernasconi A,  
614 Alassimone J, McDonald BA, Sánchez-Vallet A. 2022. Natural variation in *Avr3D1* from  
615 *Zymoseptoria* sp. contributes to quantitative gene-for-gene resistance and to host  
616 specificity. *New Phytologist* 10.1111/np.
- 617 48. Motteram J, Lovegrove A, Pirie E, Marsh J, Devonshire J, van de Meene A, Hammond-  
618 Kosack K, Rudd JJ. 2011. Aberrant protein N-glycosylation impacts upon infection-  
619 related growth transitions of the haploid plant-pathogenic fungus *Mycosphaerella*  
620 *graminicola*. *Mol Microbiol* 81:415–433.
- 621 49. Evan GI, Lewis GK, Ramsay G, Bishop JM. 1985. Isolation of monoclonal antibodies  
622 specific for human c-myc proto-oncogene product. *Mol Cell Biol* 5:3610–3616.
- 623 50. Zwiers LH, de Waard MA. 2001. Efficient *Agrobacterium tumefaciens*-mediated gene  
624 disruption in the phytopathogen *Mycosphaerella graminicola*. *Curr Genet* 39:388–393.
- 625 51. Schneider CA, Rasband WS, Eliceiri KW. 2012. NIH Image to ImageJ: 25 years of image  
626 analysis. *Nature Methods* 2012 9:7 9:671–675.
- 627 52. Stewart EL, Hagerty CH, Mikaberidze A, Mundt CC, Zhong Z, McDonald BA. 2016. An  
628 improved method for measuring quantitative resistance to the wheat pathogen  
629 *Zymoseptoria tritici* using high-throughput automated image analysis. *Phytopathology*  
630 106:782–788.
- 631 53. Vogel HJ. 1956. A convenient growth medium for *Neurospora crassa*. *Microbiology*  
632 *Genetics Bulletin* 13:42–43.
- 633 54. Schindelin J, Arganda-Carreras I, Frise E, Kaynig V, Longair M, Pietzsch T, Preibisch S,  
634 Rueden C, Saalfeld S, Schmid B, Tinevez JY, White DJ, Hartenstein V, Eliceiri K,  
635 Tomancak P, Cardona A. 2012. Fiji: an open-source platform for biological-image  
636 analysis. *Nat Methods* 9:676–682.
- 637 55. King R, Urban M, Lauder RP, Hawkins N, Evans M, Plummer A, Halsey K, Lovegrove A,  
638 Hammond-Kosack K, Rudd JJ. 2017. A conserved fungal glycosyltransferase facilitates  
639 pathogenesis of plants by enabling hyphal growth on solid surfaces. *PLoS Pathogens*  
640 13:e1006672.
- 641 56. Banerjee A, Mahata B, Dhir A, Mandal TK, Biswas K. 2019. Elevated histone H3  
642 acetylation and loss of the Sp1–HDAC1 complex de-repress the GM2-synthase gene in  
643 renal cell carcinoma. *Journal of Biological Chemistry* 294:1005–1018.
- 644 57. Liao L, Alicea-Velázquez NL, Langbein L, Niu X, Cai W, Cho EA, Zhang M, Greer CB, Yan  
645 Q, Cosgrove MS, Yang H. 2019. High affinity binding of H3K14ac through collaboration  
646 of bromodomains 2, 4 and 5 is critical for the molecular and tumor suppressor functions  
647 of PBRM1. *Mol Oncol* 13:811–828.

648 58. Team Rs. 2020. RStudio team (2020). RStudio: Integrated development for R. RStudio,  
649 PBC, Boston, MA URL <http://www.rstudio.com/>.

650 **8. TABLE**

651 **Table 1.** Classification of lysine acetyltransferase (KAT) orthologues in *Zymoseptoria tritici* strain  
652 ST99CH\_3D7.

| <b>KAT nomenclature</b> | <b>Previous nomenclature</b> | <b>KAT family</b> | <b>Gene ID in <i>Zymoseptoria tritici</i> strain ST99CH_3D7</b> |
|-------------------------|------------------------------|-------------------|-----------------------------------------------------------------|
| KAT1                    | Hat1                         | GNAT              | Not found                                                       |
| KAT2                    | Gcn5                         | GNAT              | <i>3D7.g4775</i>                                                |
| KAT5                    | Esa1                         | MYST              | <i>3D7.g9281</i>                                                |
| KAT6                    | Sas3                         | MYST              | <i>3D7.g4263</i>                                                |
| KAT8                    | Sas2                         | MYST              | <i>3D7.g7031</i>                                                |
| KAT9                    | Elp3                         | GNAT              | <i>3D7.g8500</i>                                                |
| KAT11                   | Rtt109                       | RTT109            | <i>3D7.g8867</i>                                                |
| -                       | Ngs1                         | GNAT              | <i>3D7.g2851</i>                                                |

## 653 9. FIGURE LEGENDS

654 **Figure 1. *Zymoseptoria tritici* has 3 lysine acetyltransferase (KAT) orthologues belonging to the**  
655 **MYST family (*Esa1*, *Sas2* and *Sas3*) and 3 belonging to the GNAT family (*Ngs1*, *Gcn5* and *Elp3*).**

656 A) Phylogenetic tree of the MYST family protein members from different fungal organisms. MYST  
657 sequences belonging to *Z. tritici* are indicated with orange dots. The protein names are colored  
658 according to their classification: *Sas2* (KAT8; green), *Esa1* (KAT5; orange), and *Sas3* (KAT6;  
659 yellow). B) Phylogenetic tree of GNAT family proteins from different fungal organisms. GNAT  
660 sequences belonging to *Z. tritici* are indicated with blue dots. The protein names are colored  
661 according to the type of enzyme: *Elp3* (KAT9; purple), *Gcn5* (KAT2; light red), and *Ngs1* (pink).  
662 The numbers below the branches represent the support values from 1000 bootstrap replicates  
663 using the maximum likelihood method. Trees have been rooted using the midpoint root method.  
664 Tree scale indicates branch length in the tree. Units are given in residue substitution per site. C)  
665 Domains identified in the KAT proteins of *Z. tritici*.

666 **Figure 2. Specific regulation of *Z. tritici* lysine acetyltransferase (KAT) genes during infection.**

667 Expression levels of the KAT genes *Esa1* (MYST family), *Sas2* (MYST family), *Sas3* (MYST family),  
668 *Ngs1* (GNAT family), *Gcn5* (GNAT family), *Elp3* (GNAT family) and the effector genes *Avr3D1*,  
669 *AvrStb6* and *Mycgr3G76589* under axenic conditions in two media with different nutrient  
670 content: Yeast extract sucrose broth (YSB) and minimal medium (MM); and during infection at  
671 different time points (7-, 12-, 14- and 28-days post infection; dpi). Data were obtained from  
672 previously published RNA-seq studies (NCBI accessions: SRA SRP152081 and SRP077418) (23,  
673 29). cpm: counts per million mapped reads.

674 **Figure 3. Acetylation levels of histone H3 lysine 9 (H3K9) and 14 (H3K14) in *Z. tritici* increase**

675 **during plant infection.** Relative acetylation of H3K9 (A) and H3K14 (B) in 3D7-GFP *in vitro* and *in*  
676 *planta* in different regions of *AvrStb6*: 1000 base pairs (bp; -1000), 500 base pairs (-500), 300 bp  
677 (-300) and 50 bp (-50) upstream of the start codon, within the open reading frame (ORF), and  
678 300 bp upstream of the start codon of *Avr3D1*. *TFIIIC* (100 bp upstream of start codon) was used  
679 as controls. Chromatin immunoprecipitation experiments were performed during host  
680 colonization at 11 days post infection (dpi). Acetylation levels are shown relative to H3 levels.  
681 Bars show the average of three independent biological replicates and the error bars represent  
682 the standard error of the mean. Asterisks indicate significant differences between infection and  
683 axenic conditions according to two-way ANOVA and Bonferroni tests ( $p < 0.05$ ).

684 **Figure 4. Lysine acetyltransferases (KATs) are involved in *Z. tritici* infection.** Relative biomass

685 to a reference control of the control (3D7-GFP) and the KAT mutants ( $\Delta Ngs1$ ,  $\Delta Sas2$ ,  $\Delta Sas3$ ,

686  $\Delta Gcn5$  and  $\Delta Elp3$ ) during infection at 10 days post infection (dpi) (A) and of 3D7-GFP and  $\Delta Sas3$   
687 at 6 dpi (B). Representative pictures of wheat leaves infected with 3D7-GFP and the knockout  
688 mutants in the KAT genes at 20 dpi (C). Percentage of leaf area covered by lesions (PLACL) at 17  
689 dpi (D) and pycnidia per cm<sup>2</sup> of lesion at 20 dpi (E) of wheat plants infected with the control and  
690 the KAT mutants. In A and B, black bars represent 3D7-GFP, dark grey bars represent MYST-  
691 family mutants and light grey bars represent GNAT-family mutants. In D and E, green represents  
692 3D7-GFP, orange represents MYST-family mutants and blue represents GNAT-family mutants.  
693 Dashed lines represent the median, dotted lines represent first and third quartiles and black  
694 dots represent individual data points. Asterisks indicate significant differences with 3D7-GFP  
695 according to Kruskal-Wallis and Dunn's tests (\*  $p < 0.05$ ; \*\*  $p < 0.01$ ; \*\*\*\*  $p < 0.0001$ ).

696 **Figure 5. Lysine acetyltransferases (KATs) regulate effector gene expression under axenic**  
697 **conditions.** Relative expression of *Avr3D1* (A) and *AvrStb6* (B) in the control (3D7-GFP) and the  
698 KAT mutants grown on yeast-malt-sucrose agar (YMA) for 6 days.  *$\beta$ -tubulin* and *histone H3* were  
699 used both as reference genes. Each bar corresponds to the mean expression value of 3 biological  
700 replicates and error bars represent the standard error of the mean. Asterisks indicate statistical  
701 differences with 3D7-GFP according to Kruskal-Wallis with uncorrected Dunn's tests. (\*  $p < 0.05$ ;  
702 \*\*\*  $p < 0.001$ ). Expression pattern of *AvrStb6* at the cellular level at 6 days post infection (dpi)  
703 in the control reporter line (C); and the control reporter line lacking *Sas2* (D); *Sas3* (E); *Ngs1* (F);  
704 *Gcn5* (G); and *Elp3* (H). In the reporter line, mCherry fused to histone 1 was expressed under the  
705 control of the *AvrStb6* promoter in the *AvrStb6* locus. This allowed the localization of the  
706 reporter to the nucleus (red dots) and therefore to monitor the activity of the *AvrStb6* promoter  
707 at the single-cell level (10). Fungal blastospores are labelled with mTurquoise2 and shown in  
708 yellow. Calibration bars correspond to 25  $\mu$ m.

709 **Figure 6. Lysine acetyltransferases (KATs) are involved in effector gene regulation during plant**  
710 **colonization.** Relative expression of *Avr3D1* (A), *AvrStb6* (B), *AvrStb9* (C) and *Mycgr3G76589* (D)  
711 in the control (3D7-GFP) and KAT mutants ( $\Delta Ngs1$ ,  $\Delta Sas2$ ,  $\Delta Sas3$ ,  $\Delta Gcn5$  and  $\Delta Elp3$ ) during wheat  
712 infection at 10 days post infection (dpi).  *$\beta$ -tubulin* and *histone H3* were used both as reference  
713 genes. Bars correspond to the mean expression value of 3 biological replicates per treatment  
714 and error bars represent standard error of the mean. Asterisks indicate significant differences  
715 with 3D7-GFP according to Kruskal-Wallis and Dunn's tests (\*  $p < 0.05$ ; \*\*  $p < 0.01$ ). Expression  
716 pattern of *AvrStb6* at the cellular level at 6 dpi in the E) control reporter line; and the control  
717 reporter line lacking *Sas2* (F); *Sas3* (G); *Ngs1* (H); *Gcn5* (I); and *Elp3* (J). In the reporter line,  
718 mCherry fused to histone 1 was expressed under the control of the *AvrStb6* promoter in the  
719 *AvrStb6* locus. This allowed the localization of the reporter to the nucleus (red dots) and

720 therefore monitoring the activity of the *AvrStb6* promoter at the single-cell level (10). Fungal  
 721 hyphae are labelled with mTurquoise2 and shown in yellow. Chloroplasts are indicated in blue.  
 722 White discontinuous lines indicate the stomata. Hyphae penetrating the stomata are indicated  
 723 with an arrow. Calibration bars correspond to 25  $\mu$ m.

724 **Figure 7. Histone H3 lysine 9 (H3K9) and 14 (H3K14) acetylation in effector genes is mediated**  
 725 **by *Sas3* in planta.** Relative acetylation of H3K9 (A) and H3K14 (B) in the control (3D7-GFP) and  
 726  $\Delta$ *Sas3* in different regions of *AvrStb6*: 1000 base pairs (bp; -1000), 500 base pairs (-500), 300 bp  
 727 (-300) and 50 bp (-50) upstream the start codon; and in the open reading frame region (ORF).  
 728 We also evaluated the acetylation of these two marks 300 bp upstream of the starting codon of  
 729 *Avr3D1*. *TFIIIC* (100 bp upstream of start codon) was used as control. Chromatin  
 730 immunoprecipitation experiments were performed during host colonization at 11 dpi.  
 731 Acetylation levels are shown relative to H3 levels. Bars show the average of three independent  
 732 biological replicates and the error bars represent the standard error of the mean. Asterisks  
 733 indicate significant differences between  $\Delta$ *Sas3* and 3D7-GFP according to two-way ANOVA and  
 734 Bonferroni tests ( $p < 0.05$ ).

## 735 9. SUPPLEMENTAL MATERIAL TABLES

736 **Table S1. BLASTp analysis identify 5 lysine acetyltransferases (KATs) from the MYST and GNAT**  
 737 **families in *Z. tritici*.** KATs of *Saccharomyces cerevisiae* used, query cover, E-value, percentage of  
 738 identity, accession number and gene ID of the best hit in *Z. tritici* are indicated.

| <i>S. cerevisiae</i><br>KAT | Query<br>Cover | E- value | Percentage<br>of Identity | Accession<br>( <i>Z. tritici</i> ) | Associated <i>Z. tritici</i><br>gene ID |
|-----------------------------|----------------|----------|---------------------------|------------------------------------|-----------------------------------------|
| <b>Gcn5</b>                 | 80%            | 2e-164   | 60.76%                    | SMQ49624.1                         | <i>3D7.g4775</i>                        |
| <b>Elp3</b>                 | 99%            | 0.0      | 74.24%                    | SMQ53347.1                         | <i>3D7.g8500</i>                        |
| <b>Sas2</b>                 | 60%            | 1e-46    | 39.71%                    | SMQ51878.1                         | <i>3D7.g7031</i>                        |
| <b>Sas3</b>                 | 47%            | 9e-79    | 36.83%                    | SMQ49112.1                         | <i>3D7.4263</i>                         |
| <b>Esa1</b>                 | 99%            | 5e-162   | 49.41%                    | SMQ54127.1                         | <i>3D7.9281</i>                         |

739



740 **Table S2. NCBI accession numbers used for performing the phylogenetic tree.**

| <b>KAT</b>  | <b>Organism</b>                  | <b>NCBI accession number</b> |
|-------------|----------------------------------|------------------------------|
| <b>Ngs1</b> | <i>Neurospora crassa</i>         | CAE85548.1                   |
| <b>Ngs1</b> | <i>Fusarium oxysporum</i>        | KAF6521047.1                 |
| <b>Ngs1</b> | <i>Trichoderma reesei</i>        | XP_006966911.1               |
| <b>Ngs1</b> | <i>Aspergillus fumigatus</i>     | KAH3100114.1                 |
| <b>Ngs1</b> | <i>Histoplasma capsulatum</i>    | QSS62698.1                   |
| <b>Ngs1</b> | <i>Zymoseptoria tritici</i>      | SMQ47703                     |
| <b>Ngs1</b> | <i>Candida albicans</i>          | AOW30790.1                   |
| <b>Sas2</b> | <i>Saccharomyces cerevisiae</i>  | DAA10024.1                   |
| <b>Sas2</b> | <i>Fusarium oxysporum</i>        | SCO82216.1                   |
| <b>Sas2</b> | <i>Kluyveromyces marxianus</i>   | XP_022675924                 |
| <b>Sas2</b> | <i>Beauveria bassiana</i>        | KAF1731046.1                 |
| <b>Sas2</b> | <i>Zygosaccharomyces mellis</i>  | GCE98240.1                   |
| <b>Sas2</b> | <i>Fusarium graminearum</i>      | XP_011324667.1               |
| <b>Sas2</b> | <i>Zymoseptoria tritici</i>      | SMQ51878 .1                  |
| <b>Sas3</b> | <i>Saccharomyces cerevisiae</i>  | DAA07067.1                   |
| <b>Sas3</b> | <i>Fusarium graminearum</i>      | XP_011320283.1               |
| <b>Sas3</b> | <i>Metarhizium robertsii</i>     | XP_007818471.1               |
| <b>Sas3</b> | <i>Fusarium oxysporum</i>        | EWZ39814.1                   |
| <b>Sas3</b> | <i>Magnaphorte oryzae</i>        | XP_003713627.1               |
| <b>Sas3</b> | <i>Zymoseptoria tritici</i>      | SMQ49112.1                   |
| <b>Esa1</b> | <i>Saccharomyces cerevisiae</i>  | DAA11012.1                   |
| <b>Esa1</b> | <i>Magnaphorte oryzae</i>        | XP_003719696.1               |
| <b>Esa1</b> | <i>Fusarium graminearum</i>      | Q4IEV4.1                     |
| <b>Esa1</b> | <i>Neurospora crassa</i>         | XP_962217.1                  |
| <b>Esa1</b> | <i>Zymoseptoria tritici</i>      | SMQ54127.1                   |
| <b>Gcn5</b> | <i>Saccharomyces cerevisiae</i>  | DAA07067.1                   |
| <b>Gcn5</b> | <i>Ustilago maydis</i>           | CAC80426.1                   |
| <b>Gcn5</b> | <i>Fusarium oxysporum</i>        | EWZ52160.1                   |
| <b>Gcn5</b> | <i>Neurospora crassa</i>         | XP_001728480.2               |
| <b>Gcn5</b> | <i>Schizosaccharomyces pombe</i> | Q9UUK2.1                     |
| <b>Gcn5</b> | <i>Zymoseptoria tritici</i>      | SMQ49624.1                   |
| <b>Elp3</b> | <i>Saccharomyces cerevisiae</i>  | DAA11347.1                   |
| <b>Elp3</b> | <i>Fusarium graminearum</i>      | XP_011317913.1               |
| <b>Elp3</b> | <i>Magnaphorte oryzae</i>        | XP_003710346.1               |
| <b>Elp3</b> | <i>Schizosaccharomyces pombe</i> | NP_594862.1                  |
| <b>Elp3</b> | <i>Fusarium oxisporum</i>        | XP_018239078.1               |
| <b>Elp3</b> | <i>Candida albicans</i>          | KAF6072097.1                 |
| <b>Elp3</b> | <i>Zymoseptoria tritici</i>      | SMQ53347.1                   |

742 **Table S3. Primers used in this work.**

| Primer name                  | Primer sequence                                           | Purpose                                        |
|------------------------------|-----------------------------------------------------------|------------------------------------------------|
| ASV18p_IF_KO-HAT_SAS2_F5     | TAATTAAGATATCGAGCTCGGTGAGATCCTCGTAGTAGTCGT                | Construct-KO-HAT_SAS2 with ASV19p              |
| ASV19p_IF_KO-HAT_SAS2_R5     | GGAGATGTGGAGTGGGGAGTGATTGCATTGAAACGG                      | Construct-KO-HAT_SAS2 with ASV18p              |
| ASV20p_NAT_F                 | CCCACTCCACATCTCCACTC                                      | Construct-KO-HAT_NAT Amplification with ASV21p |
| ASV21p_NAT_R                 | CCTCTTCGCTATTACGCCAG                                      | Construct-KO-HAT_NAT Amplification with ASV20p |
| ASV22p_IF_KO-HAT_SAS2_F3     | CGTAATAGCGAAGAGGCATCTCACTCATCTCACTCTCCACCGACATTGTTCCGACTG | Construct-KO-HAT_SAS2 with ASV23p              |
| ASV23p_IF_KO-HAT_SAS2_R3     | CAGTGCCAAGCTTGCATGCCGTTTCCGTTCAACACAGCCT                  | Construct-KO-HAT_SAS2 with ASV22p              |
| ASV24p_SAS2_ScreenP_F        | CATCTCACTCATCTCACTCTC                                     | Primer for screening KO-HAT_SAS2 with ASV25p   |
| ASV25p_SAS2_ScreenP_R        | GGATACGCAATGAACTTCTGG                                     | Primer for screening KO-HAT_SAS2 with ASV24p   |
| ASV26p_IF_KO-HAT_NGS1_F5     | GCCGAATTCGAGCTCGGGTGTGGTGGAAACTCTCCC                      | Construct KO-HAT_NGS1 with ASV27p              |
| ASV27p_IF_KO-HAT_NGS1_R5     | GGAGATGTGGAGTGGGTTTGCATGGATTTGAGGAGGT                     | Construct KO-HAT_NGS1 with ASV26p              |
| ASV28p_IF_KO-HAT_NGS1_F3     | CGTAATAGCGAAGAGGGATTCTCACATTCGTAACACCATCTGCTGGCACTATTGG   | Construct KO-HAT_NGS1 with ASV29p              |
| ASV29p_IF_KO-HAT_NGS1_R3     | TAAAGCTTGCATGCCGCGATACTTCTCACTACCC                        | Construct KO-HAT_NGS1 with ASV28p              |
| ASV30p_KO-HAT_NGS1_ScreenP_F | GATTCCTCACATTCGTAACAC                                     | Primer for screening KO-HAT_NGS1 with ASV31p   |
| ASV31p_KO-HAT_NGS1_ScreenP_R | ACTTCTTCTCGCTACCTCCTG                                     | Primer for screening KO-HAT_NGS1 with ASV30p   |
| ASV38p_KO-HAT_SAS3_F5        | GCCGAATTCGAGCTCGGGTCAAGGCGATGATTTCC                       | Construct KO-HAT_SAS3 with ASV39p              |
| ASV39p_KO-HAT_SAS3_R5        | GGAGATGTGGAGTGGGCATGTTGGTGGTGAACCTTGAG                    | Construct KO-HAT_SAS3 with ASV38p              |
| ASV40p_KO-HAT_SAS3_F3        | CGTAATAGCGAAGAGGCTTGAATCATGTGGCTCGTGGTTGTCCTTGTAATTCACGCC | Construct KO-HAT_SAS3 with ASV41p              |
| ASV41p_KO-HAT_SAS3_R3        | TAAAGCTTGCATGCCAATGCCTTGGTTCGCTTTCCT                      | Construct KO-HAT_SAS3 with ASV40p              |
| ASV42p_ScreenP_SAS3KO-HAT_F  | CTTGAAATCATGTGGCTCGTGG                                    | Primer for screening KO-HAT_SAS3 with ASV43p   |
| ASV43p_ScreenP_SAS3KO-HAT_R  | GCCTTCGTGTTGTCTGTCTG                                      | Primer for screening KO-HAT_SAS3 with ASV42p   |
| ASV44p_KO-HAT_GCN5_F5        | GCCGAATTCGAGCTCGGGAGGTGGAGTGTAGGTATAGG                    | Construct KO-HAT_GCN5 with ASV45p              |
| ASV45p_KO-HAT_GCN5_R5        | GGAGATGTGGAGTGGGAGAGCGAGGTCAAGTTGTGAG                     | Construct KO-HAT_GCN5 with ASV44p              |
| ASV46p_KO-HAT_GCN5_F3        | CGTAATAGCGAAGAGGAGTGAAGAAGCCTCCAGCAGGAATTACAAGCTTGGCTCAC  | Construct KO-HAT_GCN5 with ASV47p              |
| ASV47p_KO-HAT_GCN5_R3        | TAAAGCTTGCATGCCAATGCAGCGTATTGATTGAG                       | Construct KO-HAT_GCN5 with ASV46p              |
| ASV48p_ScreenP_GCN5KO-HAT_F  | AGTGAAGAAGCTCCAGCAG                                       | Primer for screening KO-HAT_GCN5 with ASV49p   |
| ASV49p_ScreenP_GCN5KO-HAT_R  | TATACCTCTCCTCGCCACTC                                      | Primer for screening KO-HAT_GCN5 with ASV48p   |
| ASV50p_KO-HAT_ELP3KO-HAT_F5  | GCCGAATTCGAGCTCGCGCCAAAGCAGTGATCAACG                      | Construct KO-HAT_ELP3 with ASV51p              |

|                             |                                                                |                                                                      |
|-----------------------------|----------------------------------------------------------------|----------------------------------------------------------------------|
| ASV51p_KO-HAT_ELP3KO-HAT_R5 | GGAGATGTGGAGTGGGATTGAGCAATGCCGACTGTG                           | Construct KO-HAT_ELP3 with ASV50p                                    |
| ASV52p_KO-HAT_ELP3KO-HAT_F3 | CGTAATAGCGAAGAGGGTGTGAGACGACCTTGAATCCAGGTCCTGGAGGTGTTGTAG<br>C | Construct KO-HAT_ELP3 with ASV53p                                    |
| ASV53p_KO-HAT_ELP3KO-HAT_R3 | TAAAGCTTGCATGCCGAAATTAGATGTAATCAAGCCCGC                        | Construct KO-HAT_ELP3 with ASV52p                                    |
| ASV54p_ScreenP_ELP3KO-HAT_F | GTGTGAGACGACCTTGAATCCA                                         | Primer for screening KO-HAT_ELP3 (ASV12) with ASV55p                 |
| ASV55p_ScreenP_ELP3KO-HAT_R | CCCTATTTGAGATTGCGTGTCAG                                        | Primer for screening KO-HAT_ELP3 (ASV12) with ASV54p                 |
| ASVp158_Myc_R               | AAATCGAATGTCCGCTCGACTATAGGTCCTCTCAGAAATAAGTTTT                 | Primer for construction of complementations with myc tag             |
| ASVp165_Gcn5c_F             | AATTAAGATATCGAGCTCGAAGGAGTAGGAGAATCTGGCG                       | Primer for construction of complementations of Gcn5                  |
| ASVp166_Gcn5_C_R            | ACTTTTGTTCCTCAGGCTGCCGATTTGTGC                                 | Primer for construction of complementations of Gcn5                  |
| ASVp167_Gcn5_Myc_F          | GCAGCCTGAGGAACAAAAGTTGATCTCTGAAGAGG                            | Primer for construction of complementations of Gcn5 + myc            |
| ASVp193_SAS3_C_F            | AATTAAGATATCGAGCTCGAAGGACGTACGGCGGTGCAG                        | Primer for construction of complementations of Sas3                  |
| ASVp194_SAS3_C_R            | ACTTTTGTTCCTCATACTGGATCTCGTCATCTCC                             | Primer for construction of complementations of Sas3                  |
| ASVp195_SAS3_myc_F          | CCAGTATGAGGAACAAAAGTTGATCTCTGAAGAGG                            | Primer for construction of complementations of Sas3                  |
| ASVp204_SAS3_C_F2           | AATTAAGATATCGAGCTCGACCTTGGTCGCTTCTCCATTT                       | Primer for construction of complementations of Sas3                  |
| ASVp205_SAS3_C_F3           | AATTAAGATATCGAGCTCGAGCCTTCGTGTTGTCTGTCTG                       | Primer for construction of complementations of Sas3                  |
| ASVp206_SAS3_C_F4           | AATTAAGATATCGAGCTCGATCCAGCACGTA CTCTGCTTATC                    | Primer for construction of complementations of Sas3                  |
| ASVp207_SAS3_C_R2           | AATTAAGATATCGAGCTCGATGGTTGAGGTGTTGCGGAAGG                      | Primer for construction of complementations of Sas3                  |
| ASVp208_SAS3_C_R3           | AATTAAGATATCGAGCTCGAGCCGAAGA ACTAGATCGTGGAG                    | Primer for construction of complementations of Sas3                  |
| ASVp219_AvrStb9_q1F         | GCTTCGTGAGCGTGAATGAC                                           | Primer for amplification of AvrStb9 in qPCR                          |
| ASVp220_AvrStb9_q1R         | GACGGATCGAGGTACCGAAC                                           | Primer for amplification of AvrStb9 in qPCR                          |
| ASVp221_AvrStb9_q2F         | CTCGTATTGCTTCTCCGC                                             | Primer for amplification of AvrStb9 in qPCR                          |
| ASVp222_AvrStb9_q2R         | ATCAAGTCCAAGGTGTCGGT                                           | Primer for amplification of AvrStb9 in qPCR                          |
| ASVp225_LM160_TFIIC_qF1     | AGAGGGGTCCGTT CATCTCA                                          | Transcription factor III - Reference gene for ChIP-qPCR              |
| ASVp226_LM161_TFIIC_qR1     | GTCGAAGCAGTAGAGGCGTT                                           | Transcription factor III - Reference gene for ChIP-qPCR              |
| ASVp232_H3_F1               | TCGCAAGTCCGCACCATCCA                                           | Histone H3 - Housekeeping gene for qPCR                              |
| ASVp232_H3_F1               | TCGCAAGTCCGCACCATCCA                                           | Histone H3 - Housekeeping gene for qPCR                              |
| ASVp238_B-Tub_F2            | GAGGAGTTCCCCGACCGCAT                                           | Beta tubulin - Housekeeping gene for qPCR                            |
| ASVp239_B-Tub_R2            | AGCTGGTGGACGGAGAGGGT                                           | Beta tubulin - Housekeeping gene for qPCR                            |
| ASVp242_AvrStb6_1000_ChIPqF | TCCCTGTCCGGAAACTAGGA                                           | Primer for amplification of 1000 bp upstream of AvrStb6 in ChIP-qPCR |
| ASVp243_AvrStb6_1000_ChIPqR | GGGCCTGCTTAATAAATGGCG                                          | Primer for amplification of 1000 bp upstream of AvrStb6 in ChIP-qPCR |

|                                  |                        |                                                                     |
|----------------------------------|------------------------|---------------------------------------------------------------------|
| ASVp246_AvrStb6_500_ChIPqF       | TTTCCGGCACTTGCTAACT    | Primer for amplification of 500 bp upstream of AvrStb6 in ChIP-qPCR |
| ASVp247_AvrStb6_500_ChIPqR       | TCCGCGCTATTCTGTATGC    | Primer for amplification of 500 bp upstream of AvrStb6 in ChIP-qPCR |
| ASVp250_AvrStb6_300_ChIPqF       | CCAGGGGCTATGCACTACTT   | Primer for amplification of 300 bp upstream of AvrStb6 in ChIP-qPCR |
| ASVp251_AvrStb6_300_ChIPqR       | CGGCTCCTGCACCCAAAATA   | Primer for amplification of 300 bp upstream of AvrStb6 in ChIP-qPCR |
| ASVp252_AvrStb6_50_ChIPqF        | CTCAACCAAGACCAAAGCAGC  | Primer for amplification of 50 bp upstream of AvrStb6 in ChIP-qPCR  |
| ASVp253_AvrStb6_50_ChIPqR        | AATGGATTCGGCGACAGGTG   | Primer for amplification of 50 bp upstream of AvrStb6 in ChIP-qPCR  |
| ASVp256_AvrStb6_ORF_ChIPqF       | ATAGATCTCTGCAAGCGGG    | Primer for amplification of ORF of AvrStb6 in ChIP-qPCR             |
| ASVp257_AvrStb6_ORF_ChIPqR       | ACACCTTGGATATTGCCCGT   | Primer for amplification of ORF of AvrStb6 in ChIP-qPCR             |
| ASVp258_1qPCR_AvrStb6_fw (LM254) | AAGGCGGGTCTAGTTGCT     | Primer for amplification of AvrStb6 in qPCR                         |
| ASVp259_1qPCR_AvrStb6_rv (LM255) | AAGCTGCTGTGATGGAGAGC   | Primer for amplification of AvrStb6 in qPCR                         |
| LM170_581_qF2                    | AGCATTGACGACTGTTGGT    | Primer for Avr3D1 amplification with LM171 in ChIP-qPCR             |
| LM171_581_qR2                    | GGTGGCTAGCTTGGAACTGT   | Primer for Avr3D1 amplification with LM170 in ChIP-qPCR             |
| LM288_Cellulase_qF4              | AACCAATACGGCGTCCAGA    | Primer for Mycgr3G76589 qPCR amplification with LM289               |
| LM289_Cellulase_qR4              | CCACTCCTGCTCACCAAGTC   | Primer for Mycgr3G76589 qPCR amplification with LM288               |
| LM343B_NATqF                     | AGGTCACCAACGTCAACG     | Primer for Copy number of resistant cassette (natR) with LM344B     |
| LM344B_NATqR                     | CTCATGTAGAGGCCAGC      | Primer for Copy number of resistant cassette (natR) with LM343B     |
| CDC48_QPCR_F2                    | GTCCTCCTGGCTGTGGTAAAAC | Primer for amplification of cell division control 48 gene in wheat  |
| CDC48_QPCR_R2                    | AGCAGCTCAGGTCCCTTGATAC | Primer for amplification of cell division control 48 gene in wheat  |

744 **10. SUPPLEMENTAL MATERIAL FIGURE LEGENDS**

745 **Figure S1. Sas3, Sas2 and Gcn5 regulate growth and development of *Z. tritici*.** Colony area of  
746 the control (3D7-GFP),  $\Delta Ngs1$ ,  $\Delta Sas2$ ,  $\Delta Sas3$ ,  $\Delta Gcn5$  and  $\Delta Elp3$  grown for 5 days on yeast-malt-  
747 sucrose agar (YMA). Green bar represents 3D7-GFP, orange bars represent MYST-family mutants  
748 and blue bars represent GNAT-family mutants. Bars represent average of three independent  
749 biological replicates and error bars represent the standard error of the mean. A representative  
750 image of colonies of each mutant is shown. Additionally, an amplification of a colony of the  
751 control and  $\Delta Sas2$  are shown. Asterisks indicate significant differences with 3D7-GFP according  
752 to Kruskal-Wallis and uncorrected Dunn's tests ( $p < 0.05$ ).

753 **Figure S2. Lysine acetyltransferases (KATs) are not positive regulators of stress tolerance.**  
754 Three  $\mu\text{L}$  of fungal spore suspensions at a concentration of  $10^6$ ,  $10^5$ ,  $10^4$  and  $10^3$  spores $\cdot\text{mL}^{-1}$  of  
755 the controls (3D7 and 3D7-GFP),  $\Delta Ngs1$ ,  $\Delta Sas2$ ,  $\Delta Sas3$ ,  $\Delta Gcn5$  and  $\Delta Elp3$  were inoculated. Media  
756 used were yeast-malt-sucrose agar (YMA); YMA supplemented with NaCl (0.5 M),  $\text{H}_2\text{O}_2$  (1 mM),  
757 sorbitol (1 M), Calcofluor white (200 ng $\cdot\mu\text{L}^{-1}$ ) or Congo red (2 mg $\cdot\text{mL}^{-1}$ ); minimal medium (MM;  
758 Vogel's), MM supplemented with fructose (5 g $\cdot\text{L}^{-1}$ ), galactose (50 mM), GlcNAc (2.5 mM), or  
759 glucose (2.5 mM). Plates were incubated at 18°C for 6 days. One additional plate of YMA was  
760 incubated at 28°C.

761 **Figure S3. Infection assays of at least two independent mutant lines of lysine**  
762 **acetyltransferases (KATs) from the MYST family.** Percentage of leaf area covered by lesions  
763 (PLACL) at 14 days post infection (dpi) (A) and at 20 dpi (B) and pycnidia per  $\text{cm}^2$  lesion at 14 dpi  
764 (C) and 20 dpi (D) in the three independent  $\Delta Sas2$  lines (#1, #2, #3). PLACL at 14 dpi (E) and 20  
765 dpi (F) and pycnidia per  $\text{cm}^2$  lesion at 14 dpi (G) and at 20 dpi (H) of two independent  $\Delta Sas3$   
766 mutant lines (#1, #2). Dashed lines represent the median, dotted lines represent first and third  
767 quartiles and black dots represent individual data points. Asterisks indicate statistically  
768 significant differences with the control (3D7-GFP) according to Kruskal-Wallis non-parametric  
769 statistical and posthoc uncorrected Dunn's tests (\*  $p < 0.05$ ; \*\*  $p < 0.01$ ; \*\*\*  $p < 0.001$ ; \*\*\*\*  $p <$   
770 0.0001).

771 **Figure S4. Infection assays of three independent mutant lines of lysine acetyltransferases**  
772 **(KATs) from the GNAT family.** Percentage of leaf area covered by lesions (PLACL) at 15 days post  
773 infection (dpi) (A) and at 20 dpi (B) and pycnidia per  $\text{cm}^2$  lesion at 15 dpi (C) and 20 dpi (D) in  
774 three  $\Delta Ngs1$  independent lines (#1, #2, #3). PLACL at 15 dpi (E) and 21 dpi (F) and pycnidia per  
775  $\text{cm}^2$  lesion at 15 dpi (G) and at 21 dpi (H) of three independent lines of  $\Delta Gcn5$  (#1, #2, #3). PLACL  
776 at 14 dpi (I) and 23 dpi (J) and pycnidia per  $\text{cm}^2$  lesion at 14 dpi (K) and at 23 dpi (L) of three

777 independent lines of  $\Delta E/p3$  (#1, #2, #3). Dashed lines represent the median, dotted lines  
778 represent first and third quartiles and black dots represent individual data points. Asterisks  
779 indicate statistically significant differences with 3D7-GFP according to the Kruskal-Wallis non-  
780 parametric statistical and posthoc uncorrected Dunn's tests (\*  $p < 0.05$ ; \*\*  $p < 0.01$ ; \*\*\*  $p <$   
781  $0.001$ ; \*\*\*\*  $p < 0.0001$ ).

782 **Figure S5. Fungal biomass of  $\Delta Sas3$  and  $\Delta Gcn5$ .** Relative fungal biomass of the control (3D7-  
783 GFP), two independent lines of  $\Delta Sas3$  and three independent lines of  $\Delta Gcn5$  at 6 days post  
784 infection (dpi). Bars correspond to the average of three biological replicates. Error bars  
785 represent the standard error of the mean. No significant differences with 3D7-GFP according to  
786 the Kruskal-Wallis test were identified ( $p < 0.05$ ).

787 **Figure S6.  $\Delta Sas2$ ,  $\Delta Sas3$  and  $\Delta Gcn5$  produce anormal macroscopic disease symptoms.**  
788 Amplified pictures of leaves (length 14 cm) infected by 3D7-GFP (A),  $\Delta Sas2$  (B),  $\Delta Sas3$  (C) and  
789  $\Delta Gcn5$  (D) at 20 days post infection. Red/orange/yellow symptoms produced in the wheat  
790 cultivar Runal by the mutants are indicated with colored arrows. Note that no pycnidia were  
791 produced by  $\Delta Sas3$  and  $\Delta Gcn5$  in the spots with red/orange/yellow symptoms.

792 **Figure S7. Complementation of  $\Delta Sas3$  and  $\Delta Gcn5$  recover the virulence phenotype.** Percentage  
793 of leaf area covered by lesions (A) and pycnidia per  $\text{cm}^2$  of lesion (B) at 17 days post infection  
794 (dpi). Dashed lines represent the median, dotted lines represent first and third quartiles and  
795 black dots represent individual data points. Asterisks indicate statistically significant differences  
796 with 3D7-GFP according to the Kruskal-Wallis non-parametric statistical and posthoc  
797 uncorrected Dunn's tests (\*  $p < 0.05$ ; \*\*  $p < 0.01$ ; \*\*\*\*  $p < 0.0001$ ).

798 **Figure S8. The expression pattern of *Mycgr3G76589* is not altered in lysine acetyltransferase**  
799 **(KAT) mutants under axenic conditions.** Relative expression of *Mycgr3G76589* in 3D7-GFP and  
800 the KATs mutants grown on yeast-malt-sucrose agar (YMA) for 6 days. Tubulin and histone H3  
801 were used as reference genes. Each bar corresponds to the average of 3 biological replicates.  
802 Error bars represent the standard error of the mean. No significant differences with 3D7-GFP  
803 according to the Kruskal-Wallis test were found ( $p < 0.05$ ).

804 **Figure S9. PCR screening strategy to identify gene deletion mutants.** Top: Blue crosses  
805 represent homologous recombination events during fungal transformation. The forward  
806 screening primer binding sites within the gene of interest and the T-DNA are identical. Sizes of  
807 different parts do not correspond to a specific construct used in this study. Bottom: Example  
808 screening results for  $\Delta E/p3$  mutant lines using liquid cultures directly added to the reaction. PCRs

809 using forward and reverse screening primers yield distinct amplicons for native genes (1967 bp)  
810 and disrupted genes (1058 bp). Each lane represents a different mutant line.

A

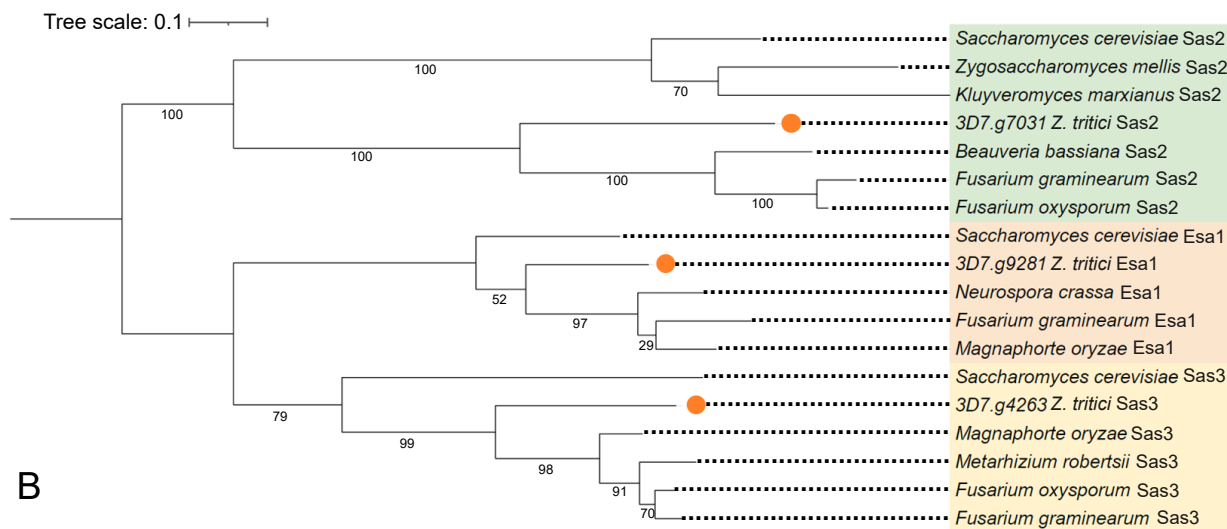

B

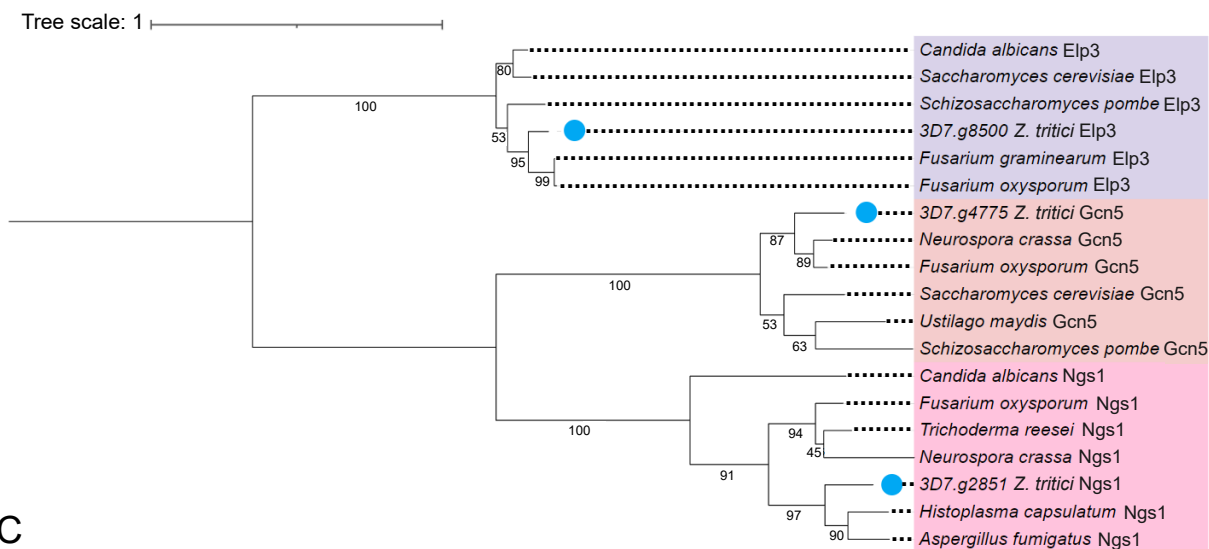

C

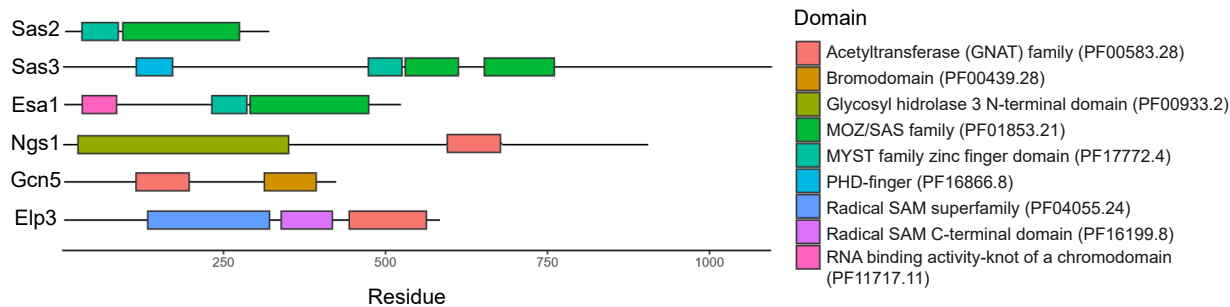



Figure 2

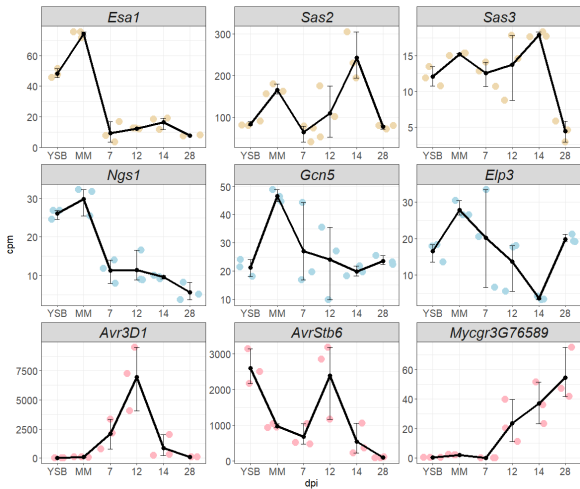

A

Figure 3

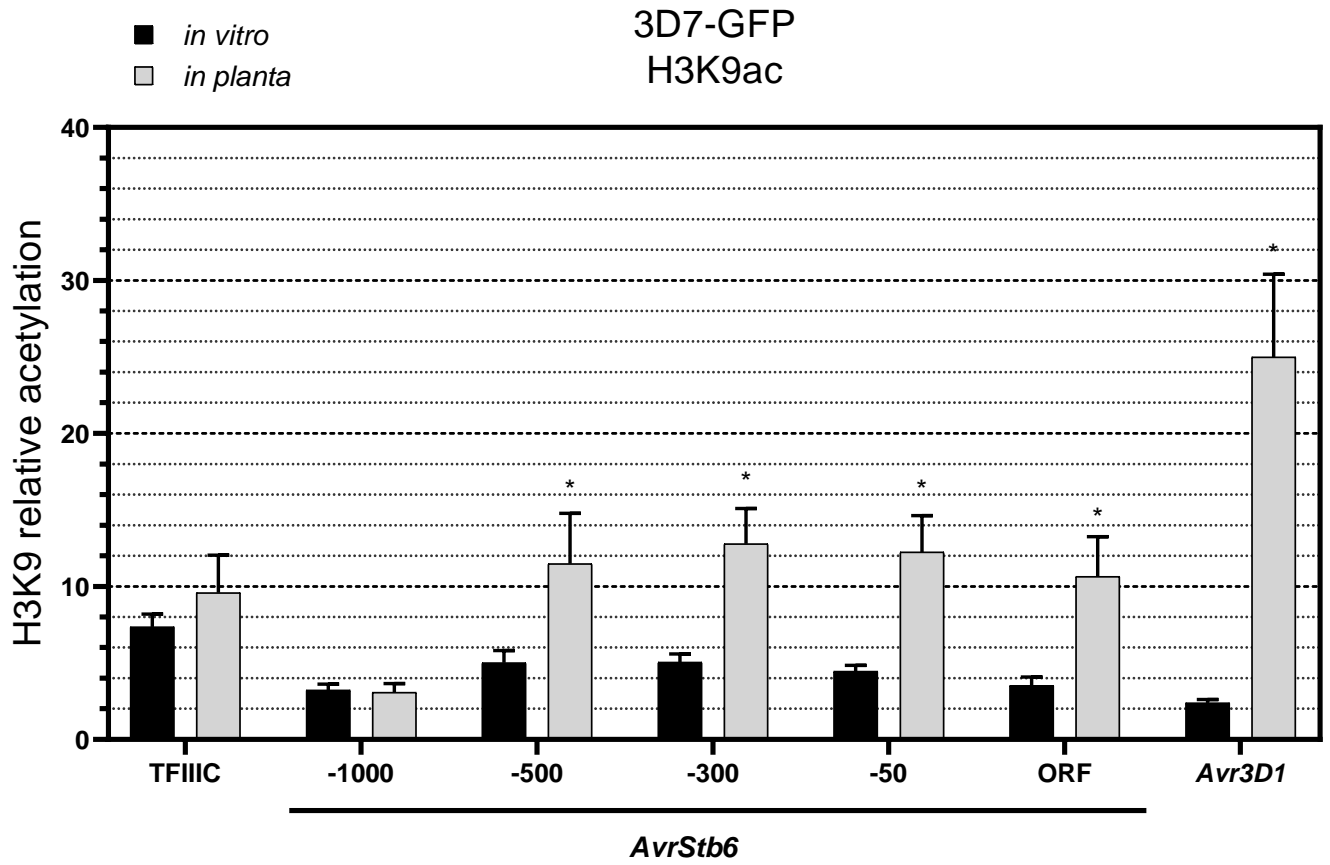

B

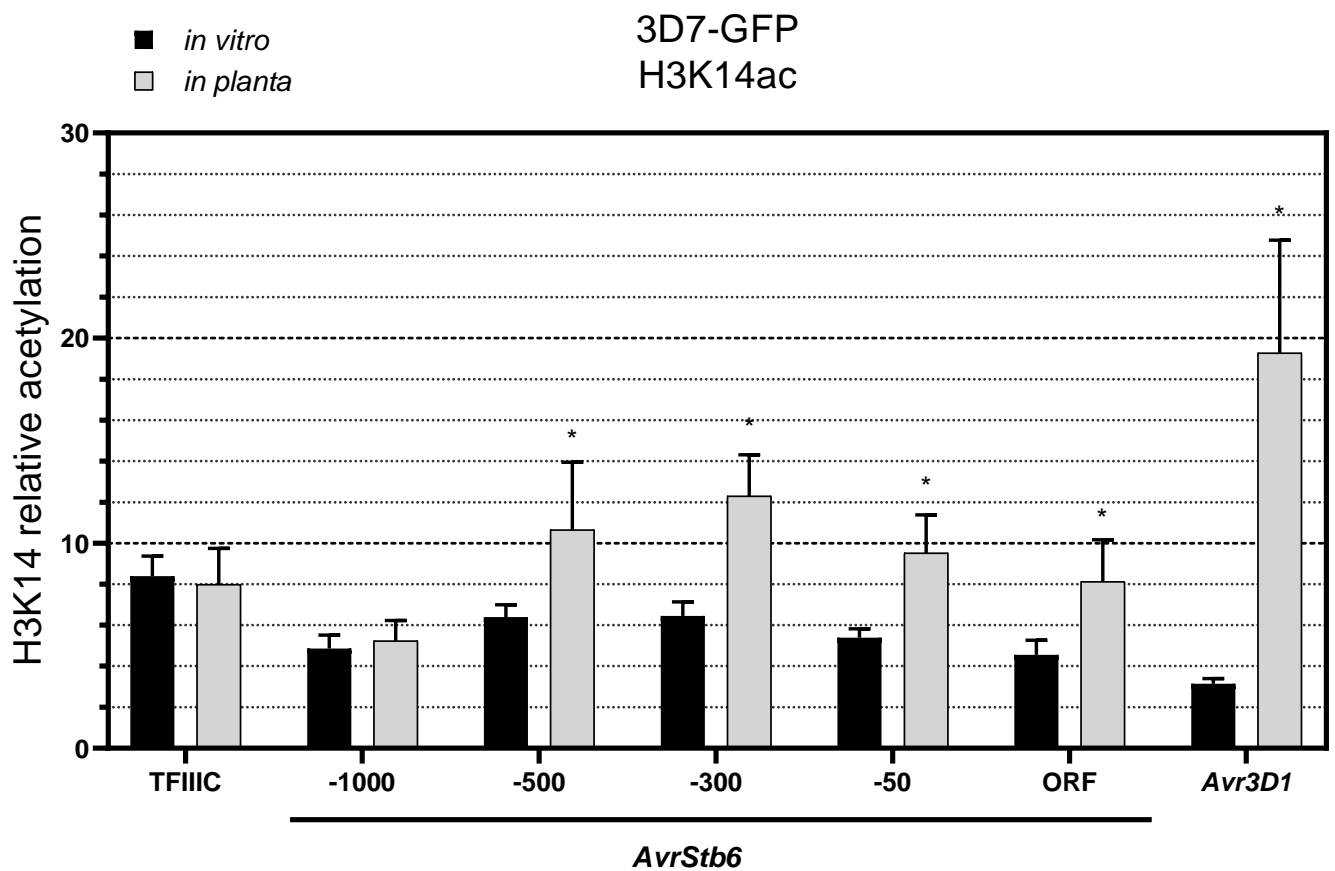

Figure 4

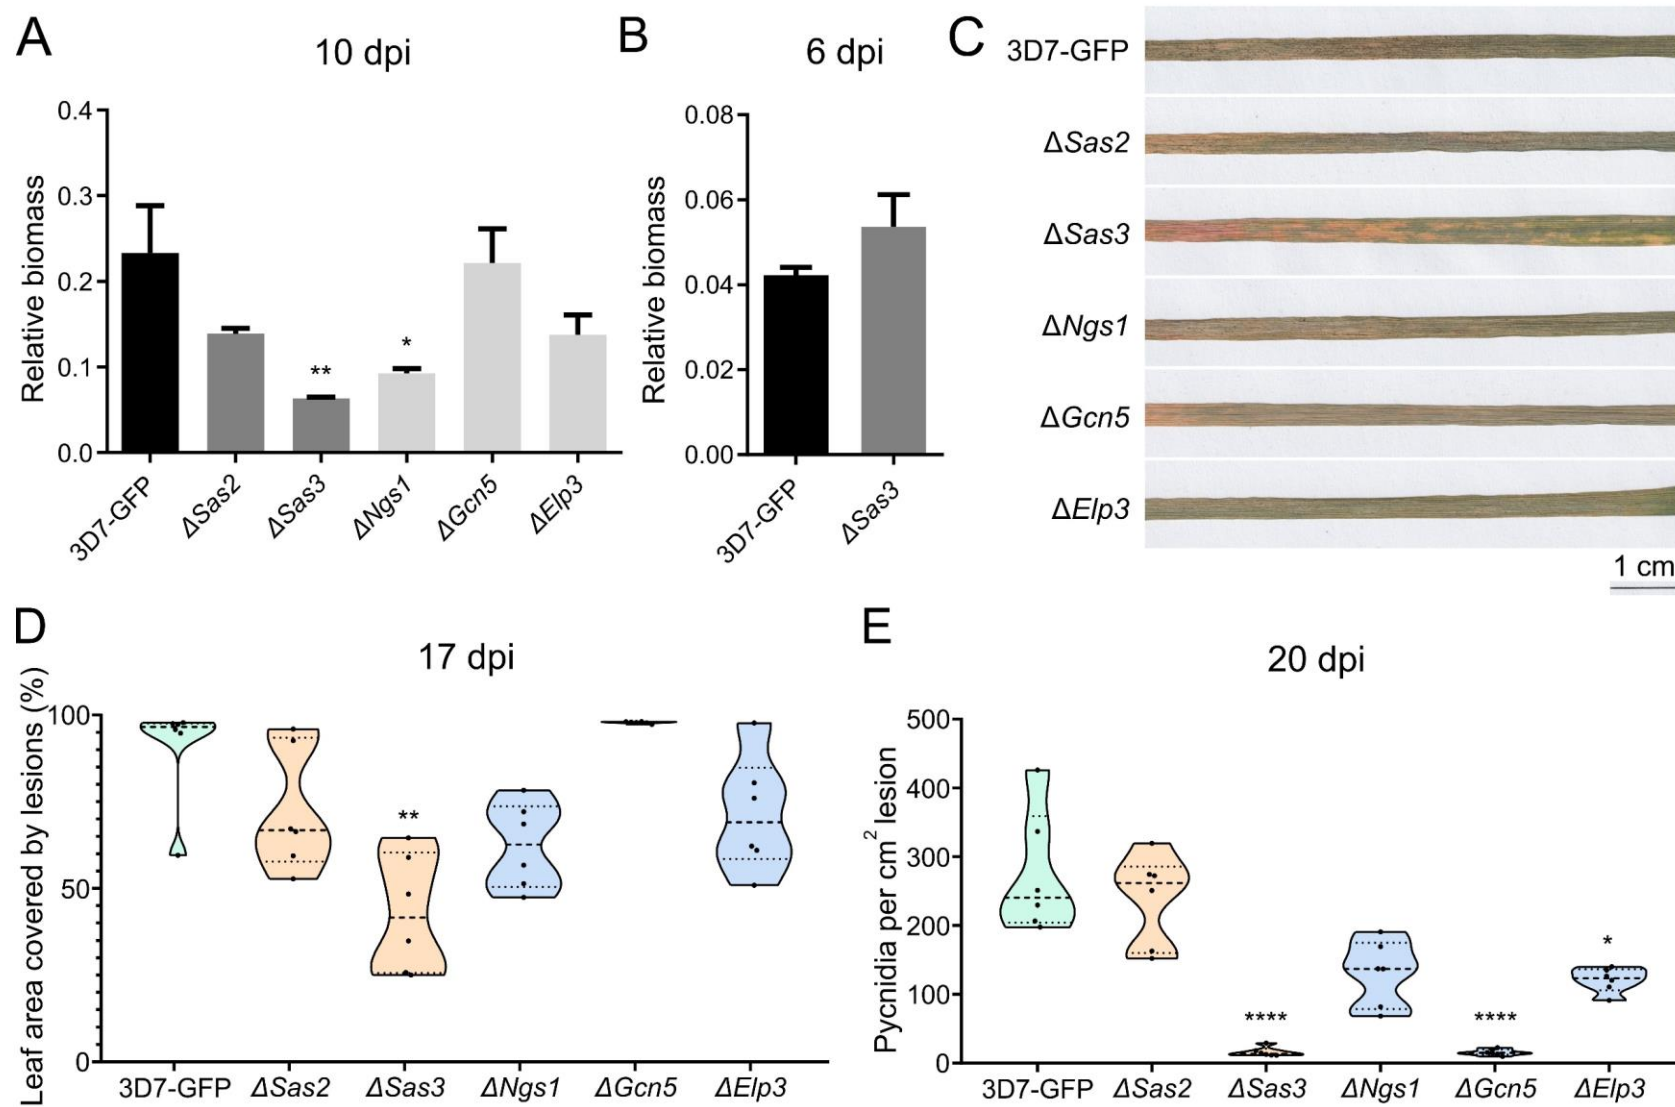

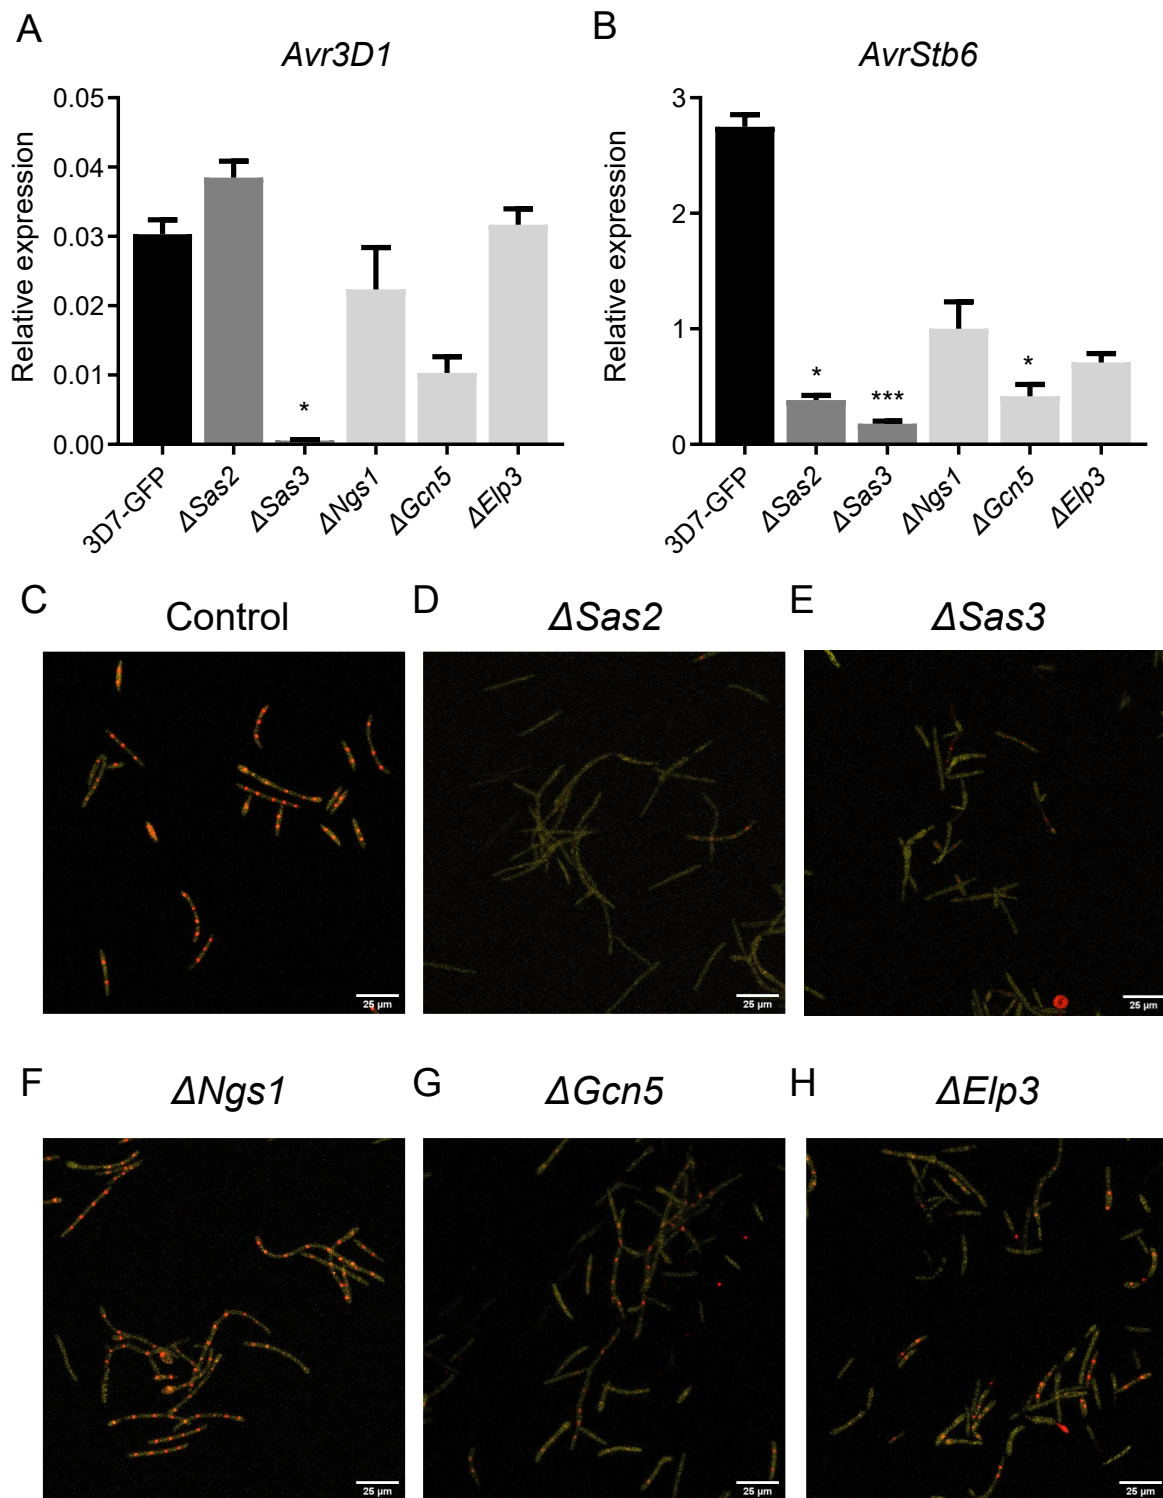

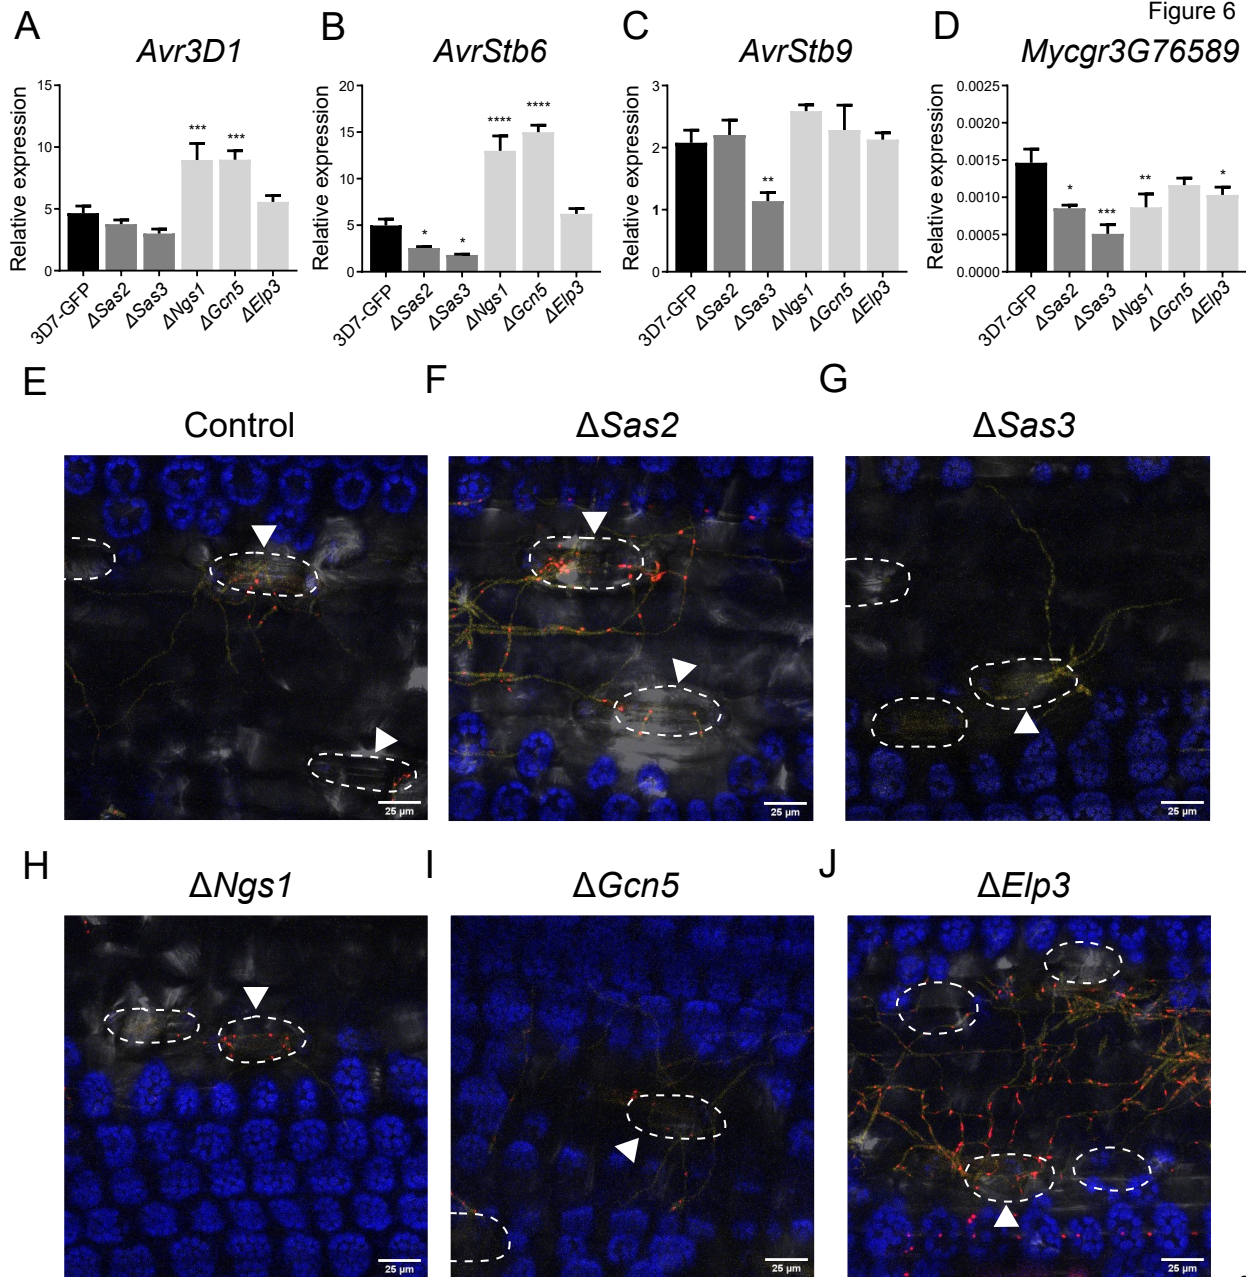

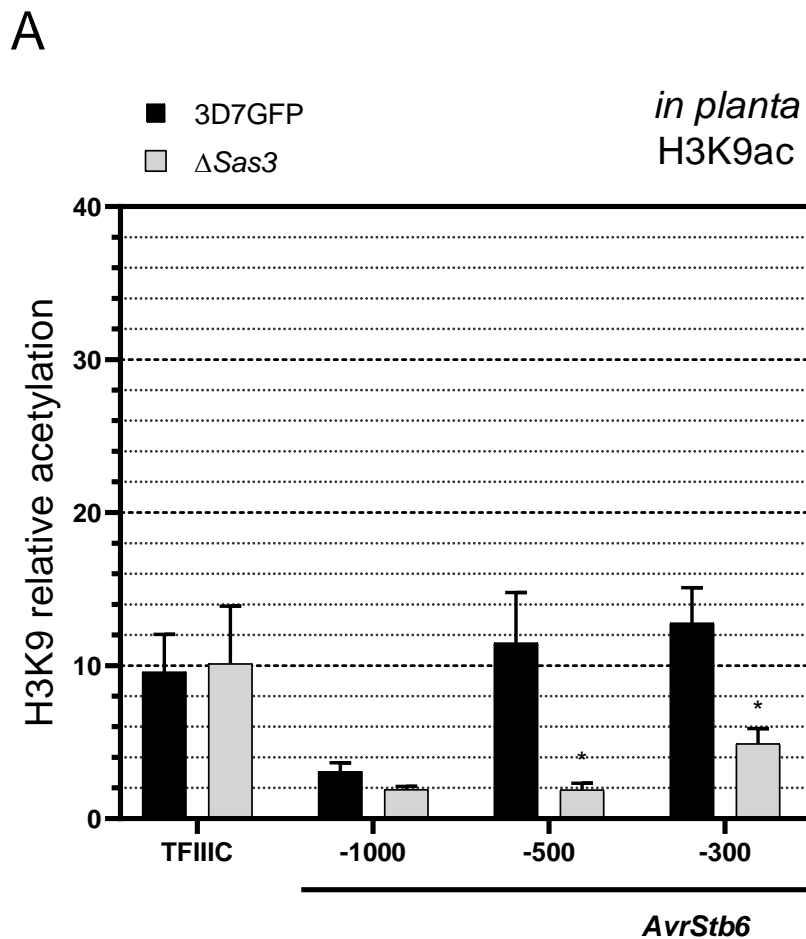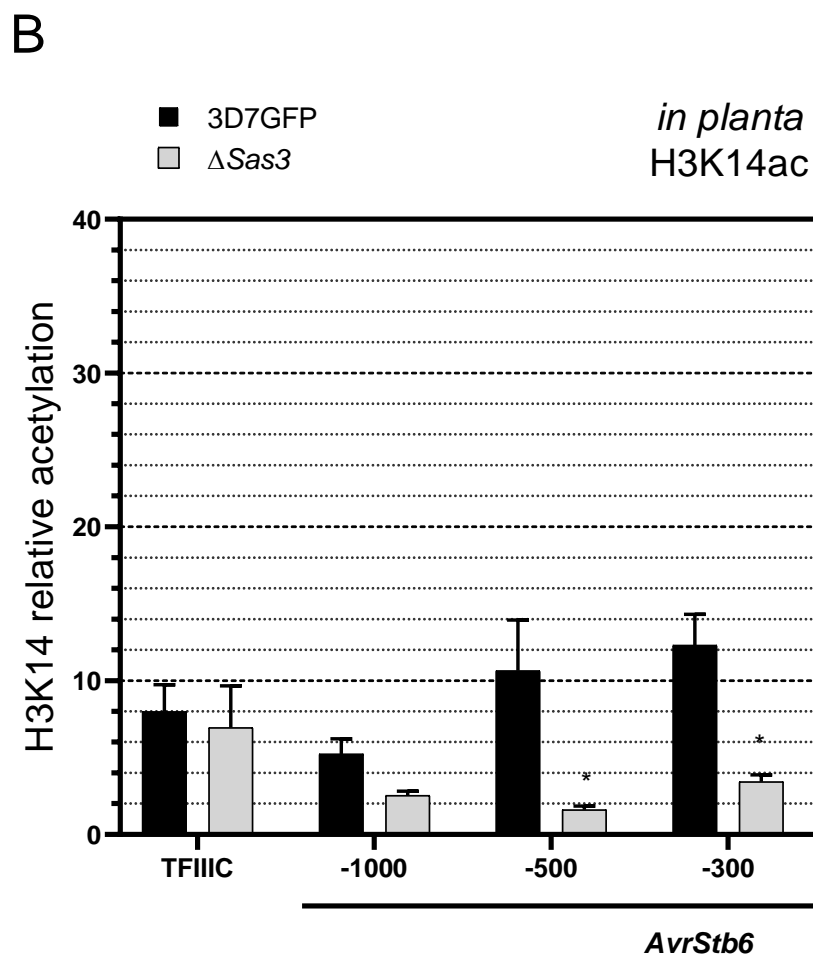

Figure S1

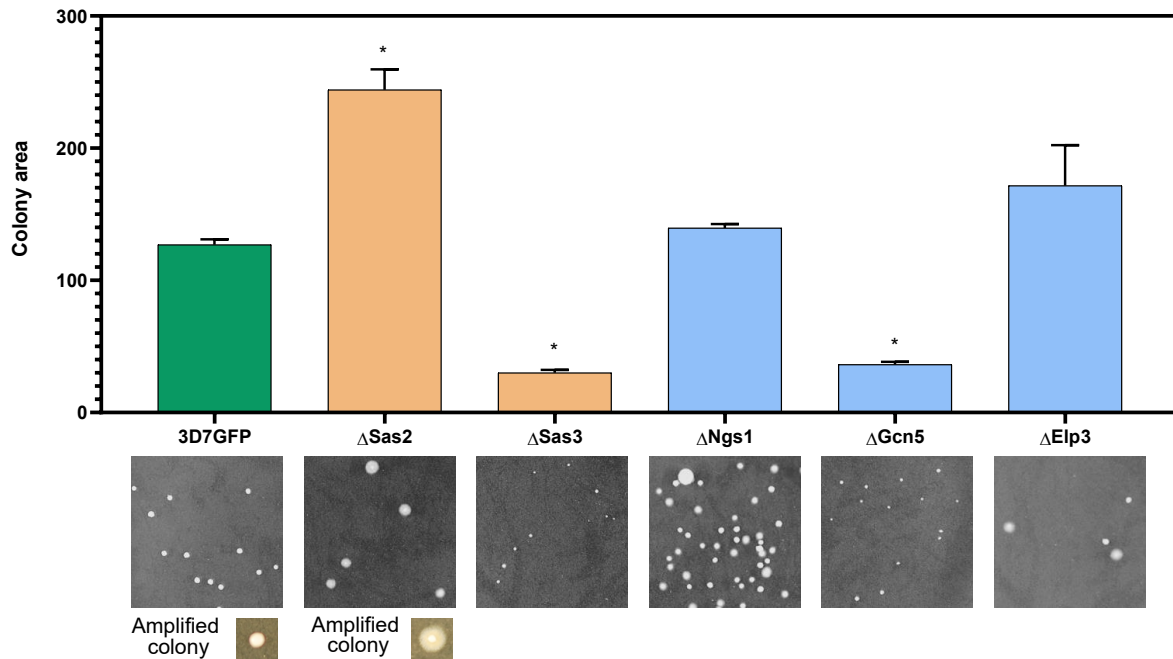

Figure S2

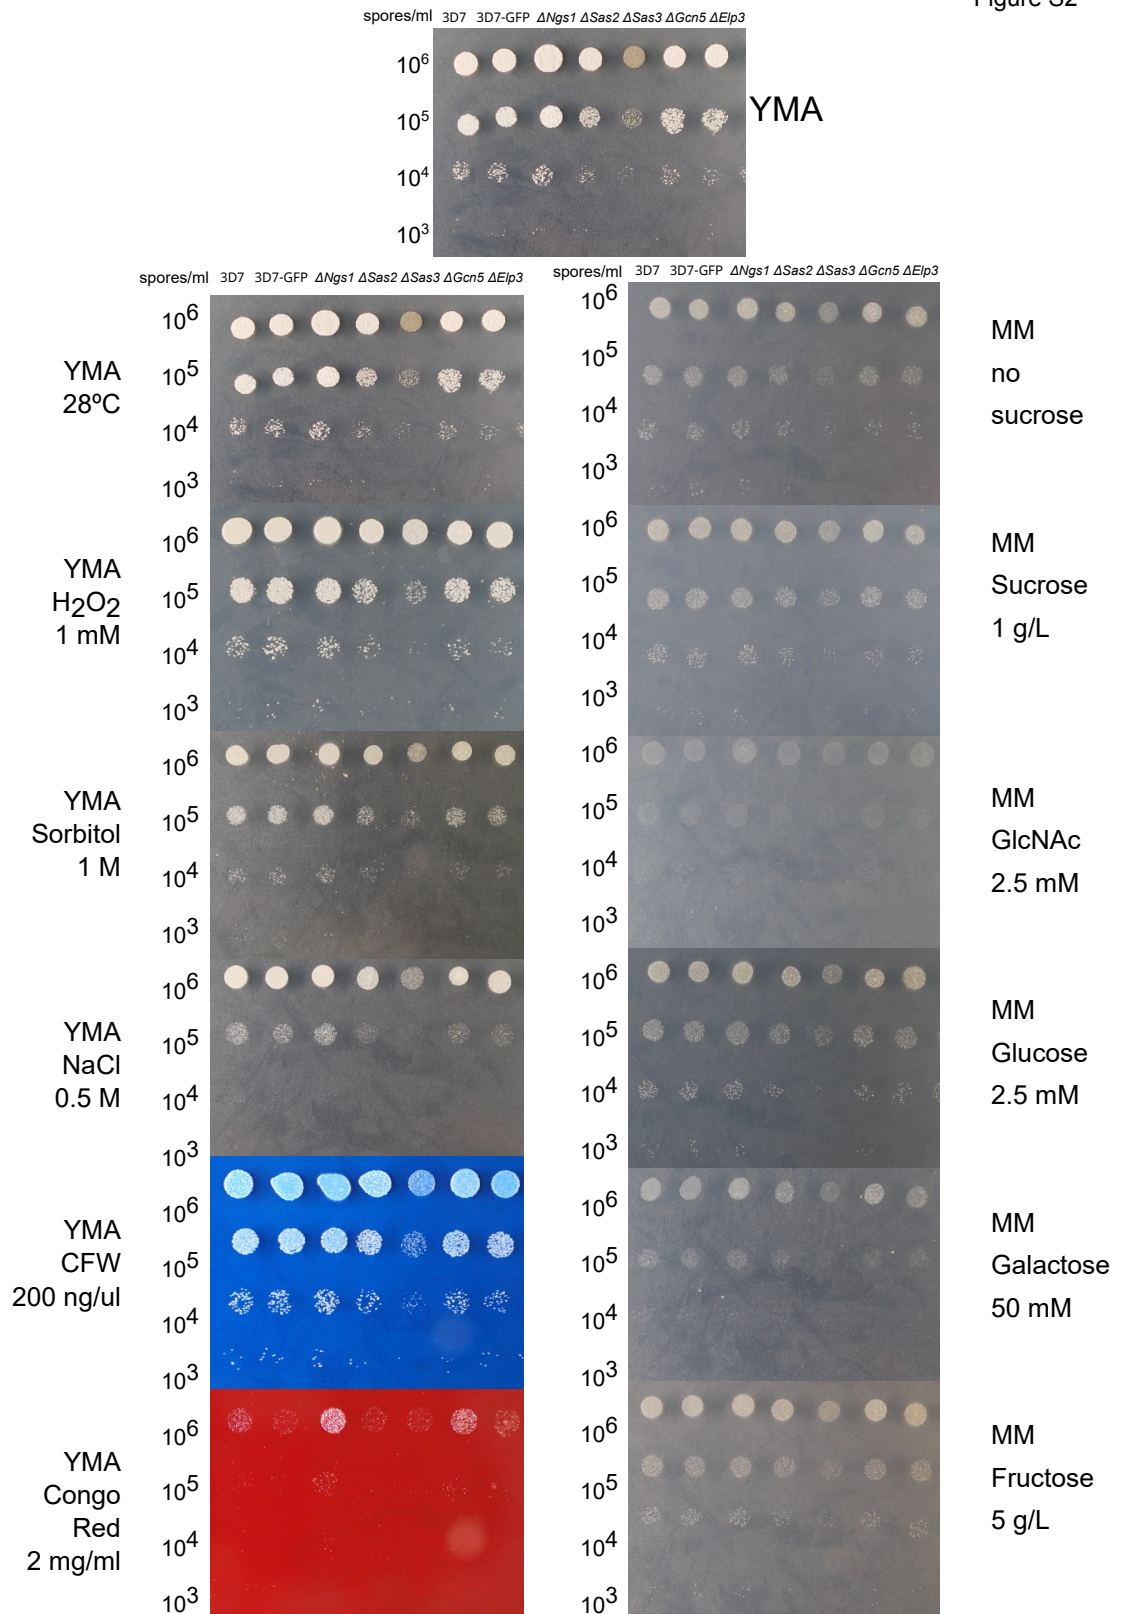



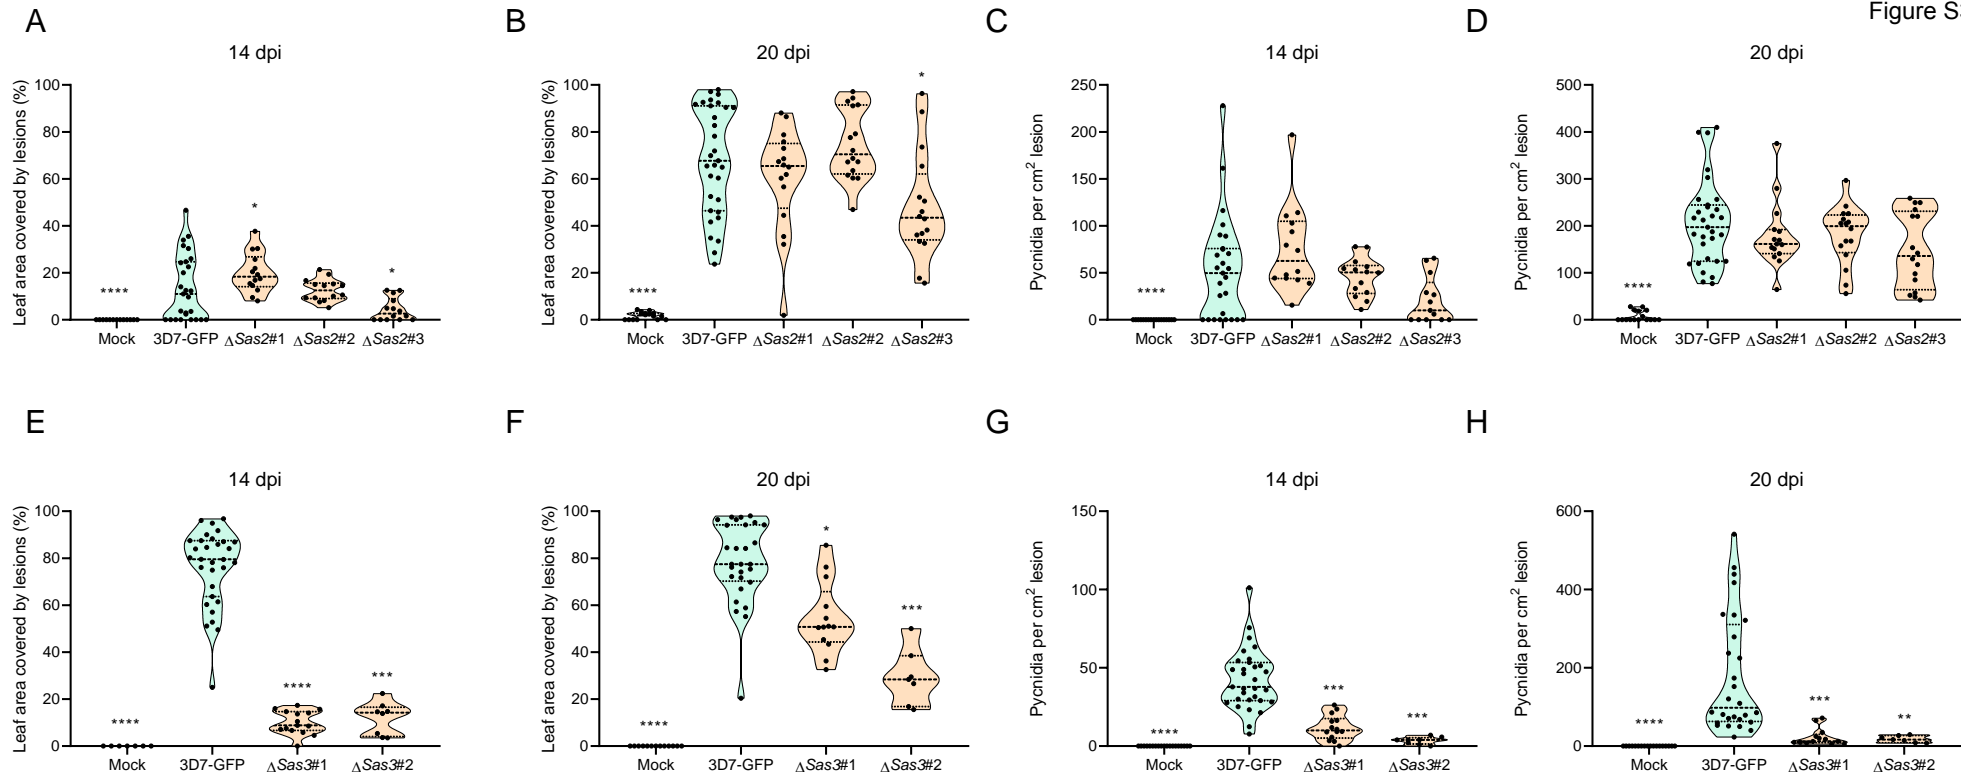

A

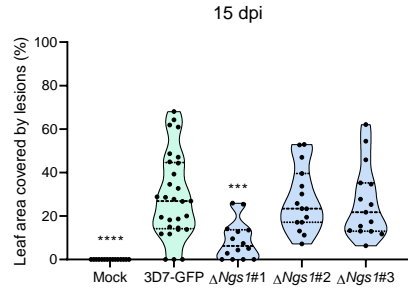

B

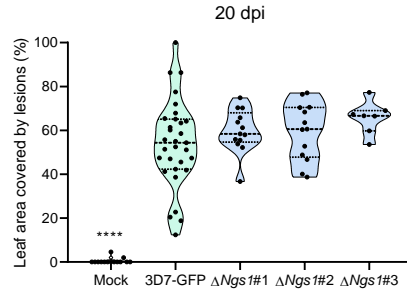

C

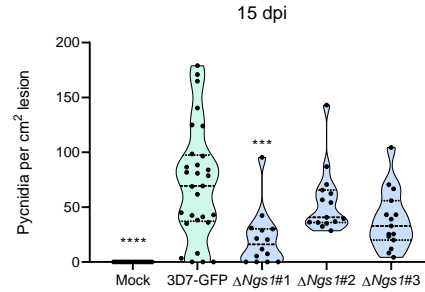

D

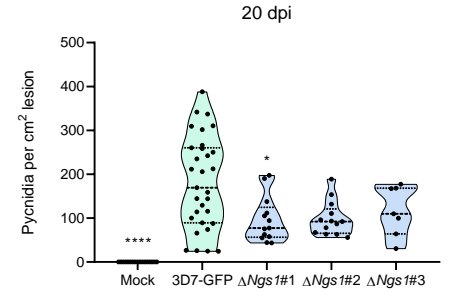

E

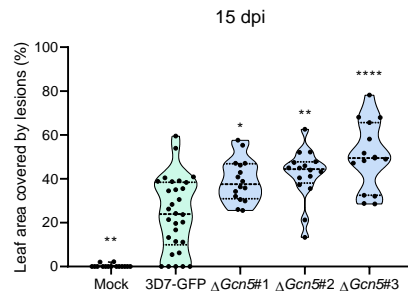

F

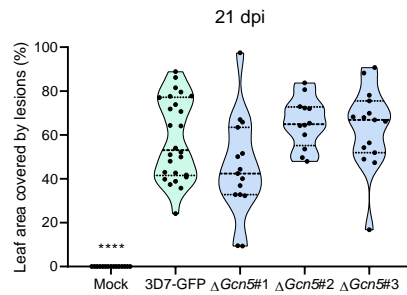

G

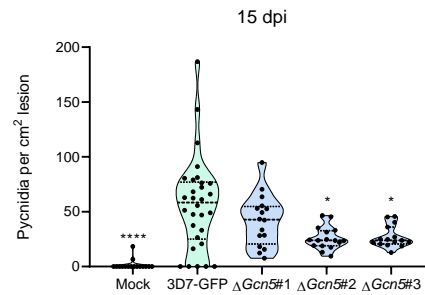

H

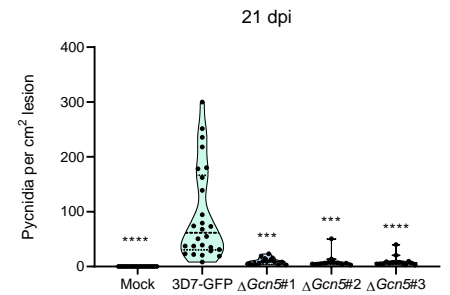

I

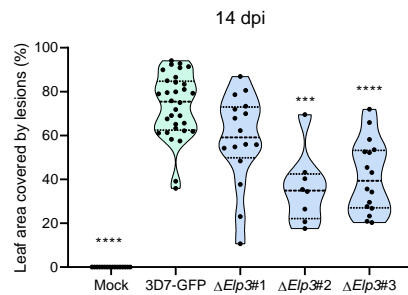

J

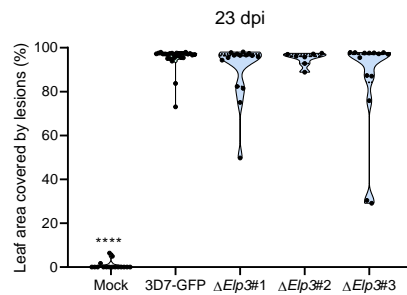

K

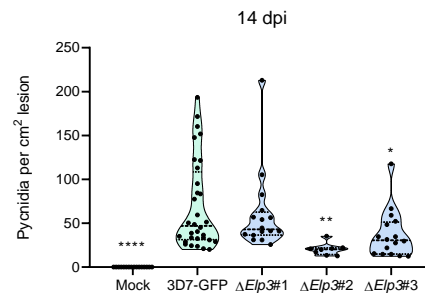

L

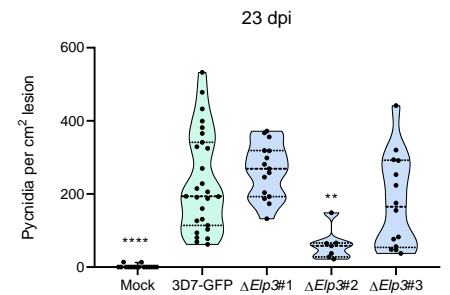

6 dpi

Figure S5

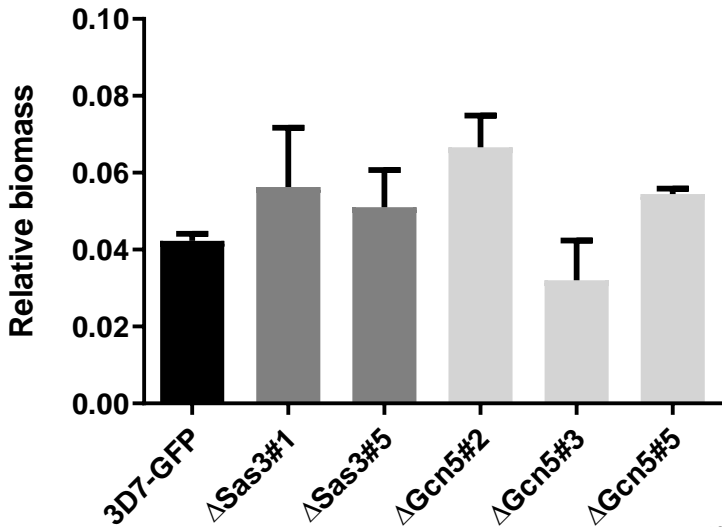

A 3D7-GFP

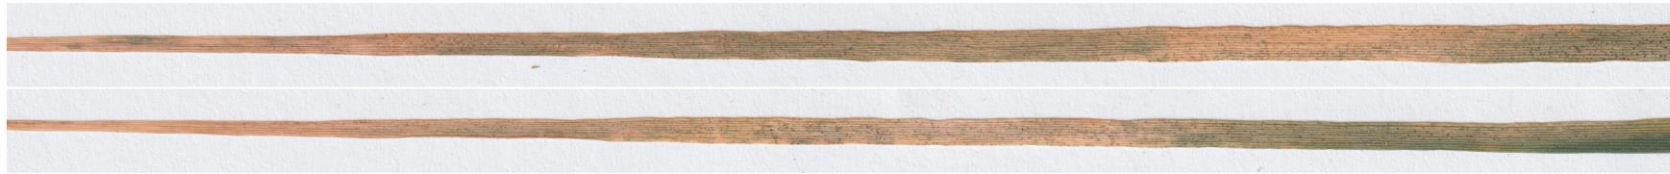

B  $\Delta$ Sas2

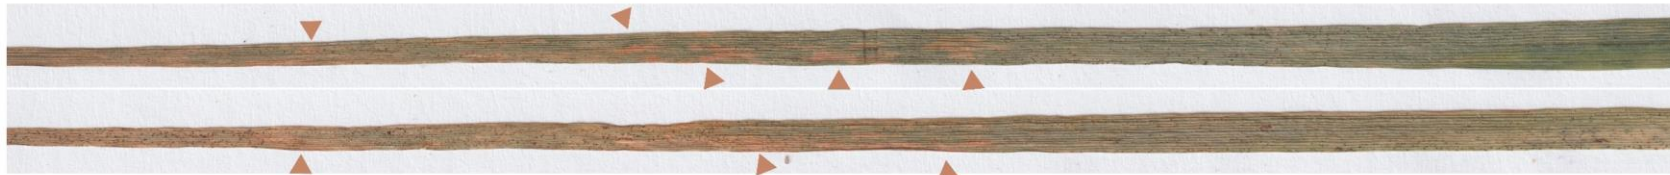

C  $\Delta$ Sas3

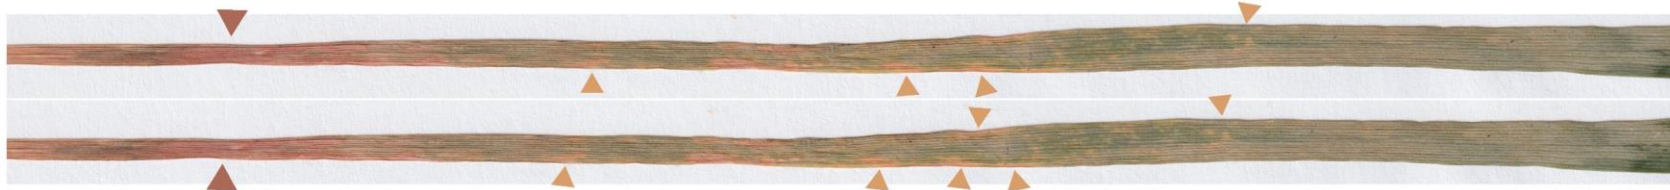

D  $\Delta$ Gcn5

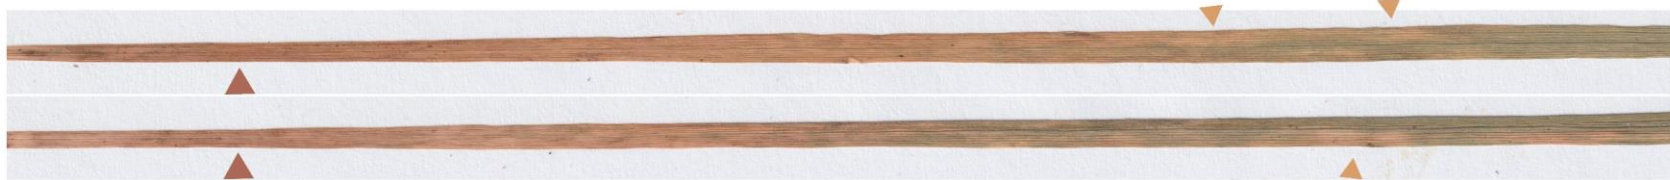

A

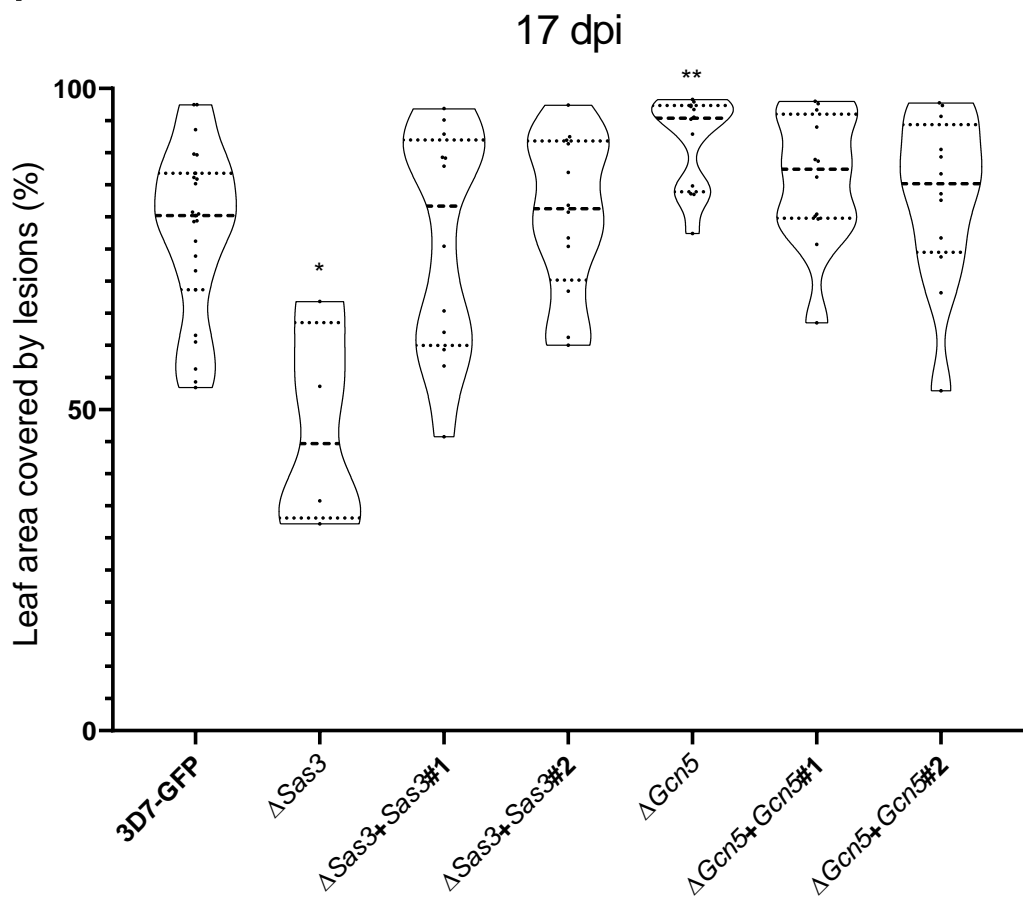

B

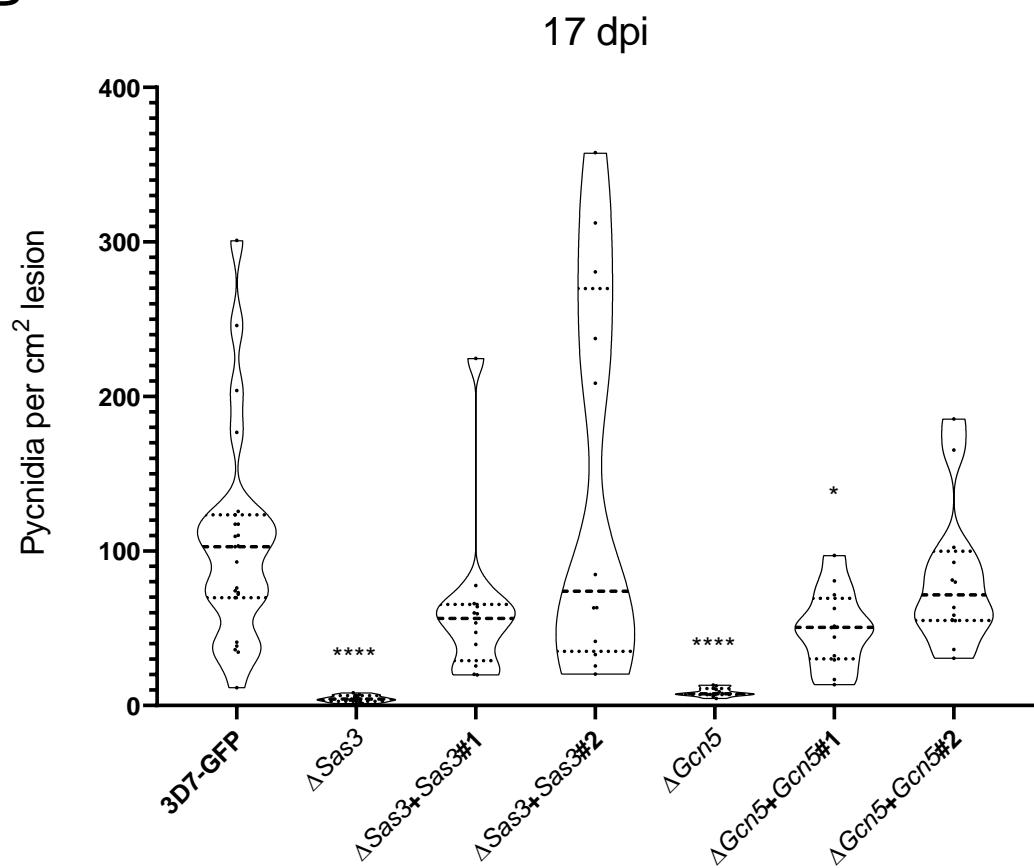

*Mycgr3G76589*  
*in vitro* 6 dpi

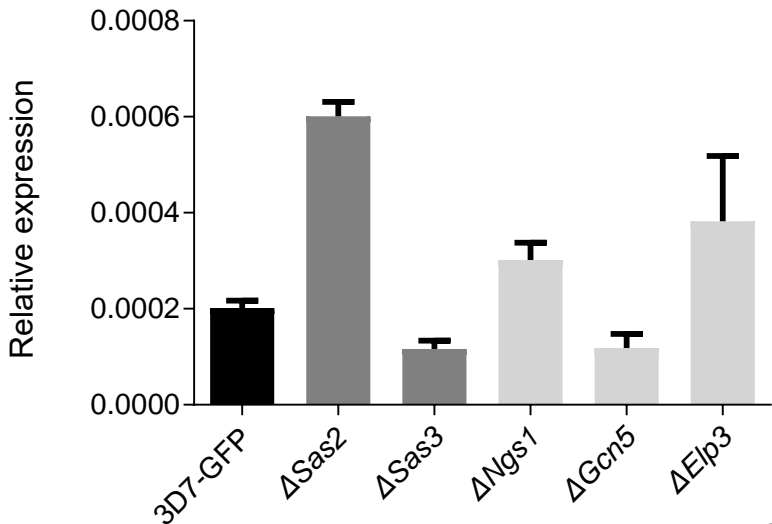

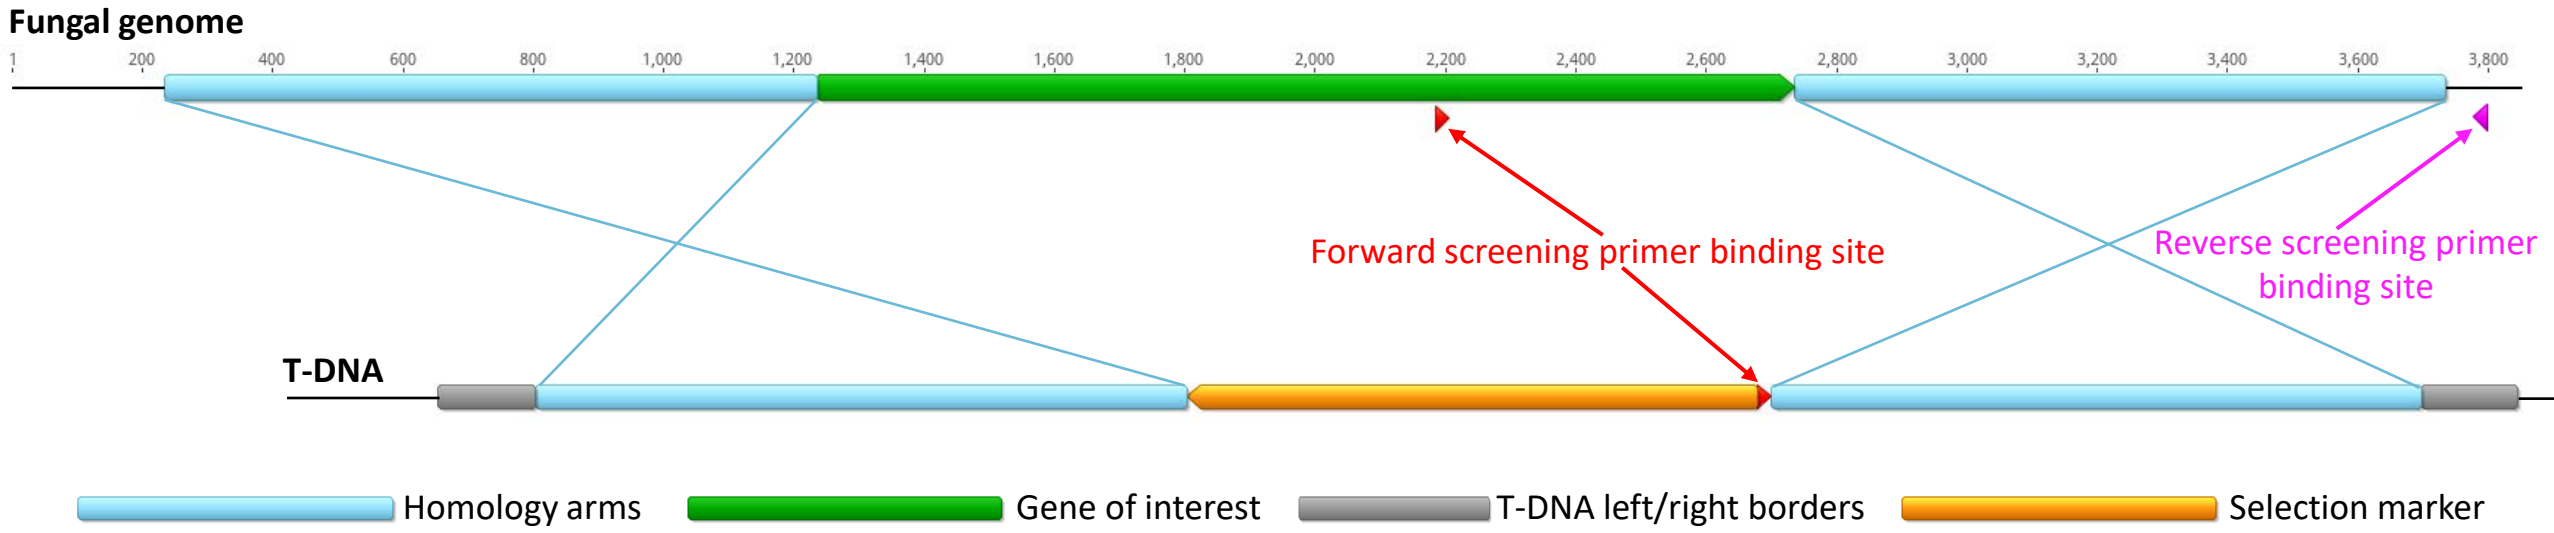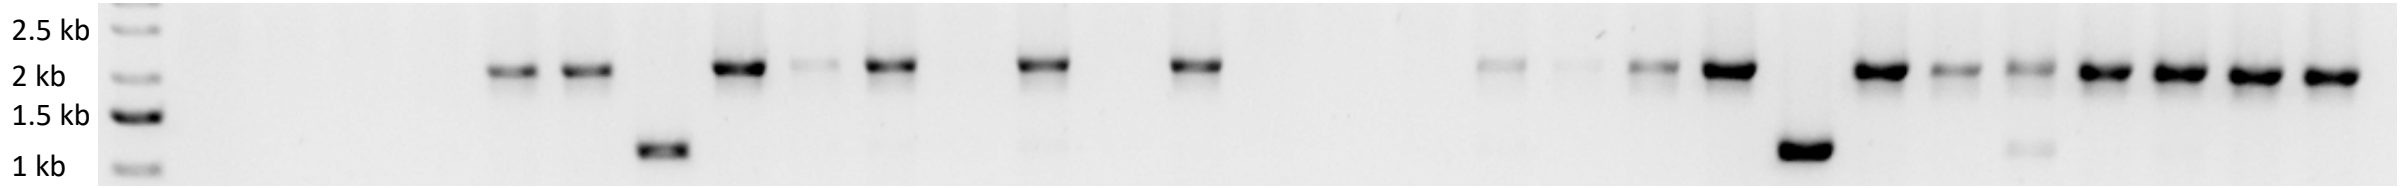

Source: https://www.biorxiv.org/content/10.1101/2023.01.18.524538v1.full.pdf
